# Supplementary material for: New Insight into the Phylogeny and Taxonomy of Cultivated and Related Species of Crataegus in China, Based on Complete Chloroplast Genome Sequencing
Source: MDPI journal article supplement (doi:10.3390/horticulturae7090301), 2021-09-09
Supplement: s1 [file s1]

**Table S1.** The repeat sequences list of four *Crataegus* species.

| Sample                  | Repeat A<br>length | Repeat A<br>Start Position | Repeat A Location      | Partition<br>1 | Partition<br>2 | Repeat B<br>length | Repeat B<br>Start Position | Repeat B Location      | Partition<br>1 | Partition<br>2 | Repeat<br>Type |
|-------------------------|--------------------|----------------------------|------------------------|----------------|----------------|--------------------|----------------------------|------------------------|----------------|----------------|----------------|
| <i>C. bretschnideri</i> | 34                 | 11                         | <i>rps19-trnH(GUG)</i> | Spacer         | LSC            | 34                 | 11                         | <i>rps19-trnH(GUG)</i> |                | LSC            | P              |
| <i>C. bretschnideri</i> | 31                 | 8359                       | <i>psbI-trnS(GCU)</i>  | Spacer         | LSC            | 31                 | 38037                      | <i>psbC-trnS(UGA)</i>  |                | LSC            | F              |
| <i>C. bretschnideri</i> | 30                 | 8360                       | <i>psbI-trnS(GCU)</i>  | Spacer         | LSC            | 30                 | 47759                      | <i>ycf3-trnS(GGA)</i>  |                | LSC            | P              |
| <i>C. bretschnideri</i> | 31                 | 10245                      | <i>trnR(UCU)-atpA</i>  | Spacer         | LSC            | 31                 | 10262                      | <i>trnR(UCU)-atpA</i>  |                | LSC            | P              |
| <i>C. bretschnideri</i> | 31                 | 10250                      | <i>trnR(UCU)-atpA</i>  | Spacer         | LSC            | 31                 | 10250                      | <i>trnR(UCU)-atpA</i>  |                | LSC            | P              |
| <i>C. bretschnideri</i> | 33                 | 13705                      | <i>atpF-atpH</i>       | Spacer         | LSC            | 33                 | 13705                      | <i>atpF-atpH</i>       |                | LSC            | P              |
| <i>C. bretschnideri</i> | 33                 | 30899                      | <i>petN-psbM</i>       | Spacer         | LSC            | 33                 | 71078                      | <i>rpl33-rps18</i>     |                | LSC            | R              |
| <i>C. bretschnideri</i> | 30                 | 31883                      | <i>psbM-trnD(GUC)</i>  | Spacer         | LSC            | 30                 | 31883                      | <i>psbM-trnD(GUC)</i>  |                | LSC            | R              |
| <i>C. bretschnideri</i> | 32                 | 32148                      | <i>psbM-trnD(GUC)</i>  | Spacer         | LSC            | 32                 | 32148                      | <i>psbM-trnD(GUC)</i>  |                | LSC            | P              |
| <i>C. bretschnideri</i> | 30                 | 38038                      | <i>psbC-trnS(UGA)</i>  | Spacer         | LSC            | 30                 | 47759                      | <i>ycf3-trnS(GGA)</i>  |                | LSC            | P              |
| <i>C. bretschnideri</i> | 32                 | 38989                      | <i>psbZ-trnG(UCC)</i>  | Spacer         | LSC            | 32                 | 38989                      | <i>psbZ-trnG(UCC)</i>  |                | LSC            | R              |
| <i>C. bretschnideri</i> | 38                 | 46291                      | <i>ycf3</i>            | Intron         | LSC            | 38                 | 125078                     | <i>ndhA</i>            | Intron         | SSC            | F              |
| <i>C. bretschnideri</i> | 39                 | 46291                      | <i>ycf3</i>            | Intron         | LSC            | 39                 | 102299                     | <i>rps12-trnV(GAC)</i> | Spacer         | IRa            | F              |
| <i>C. bretschnideri</i> | 39                 | 46291                      | <i>ycf3</i>            | Intron         | LSC            | 39                 | 144870                     | <i>trnV(GAC)-rps12</i> | Spacer         | IRb            | P              |
| <i>C. bretschnideri</i> | 30                 | 46303                      | <i>ycf3</i>            | Intron         | LSC            | 30                 | 102311                     | <i>rps12-trnV(GAC)</i> | Spacer         | IRa            | F              |
| <i>C. bretschnideri</i> | 30                 | 46303                      | <i>ycf3</i>            | Intron         | LSC            | 30                 | 144867                     | <i>trnV(GAC)-rps12</i> | Spacer         | IRb            | P              |
| <i>C. bretschnideri</i> | 35                 | 49210                      | <i>trnT(UGU)</i>       | Exon           | LSC            | 35                 | 49244                      | <i>trnT(UGU)</i>       | Exon           | LSC            | F              |
| <i>C. bretschnideri</i> | 63                 | 55462                      | <i>trnM(CAU)-atpE</i>  | Spacer         | LSC            | 63                 | 55462                      | <i>trnM(CAU)-atpE</i>  | Spacer         | LSC            | P              |
| <i>C. bretschnideri</i> | 33                 | 62245                      | <i>accD-psaI</i>       | Spacer         | LSC            | 33                 | 62269                      | <i>accD-psaI</i>       | Spacer         | LSC            | F              |
| <i>C. bretschnideri</i> | 30                 | 62247                      | <i>accD-psaI</i>       | Spacer         | LSC            | 30                 | 62320                      |                        |                | LSC            | F              |
| <i>C. bretschnideri</i> | 30                 | 62276                      | <i>accD-psaI</i>       | Spacer         | LSC            | 30                 | 62306                      |                        |                | LSC            | F              |
| <i>C. bretschnideri</i> | 38                 | 70019                      | <i>trnP(UGG)-psaJ</i>  | Spacer         | LSC            | 38                 | 70052                      |                        |                | LSC            | F              |
| <i>C. bretschnideri</i> | 32                 | 70433                      | <i>psaJ-rpl33</i>      | Spacer         | LSC            | 32                 | 70433                      |                        |                | LSC            | R              |

|                          |    |        |                        |        |     |    |        |                        |        |     |   |
|--------------------------|----|--------|------------------------|--------|-----|----|--------|------------------------|--------|-----|---|
| <i>C. bretschneideri</i> | 30 | 71710  | <i>rps18-rpl20</i>     | Spacer | LSC | 30 | 71734  |                        |        | LSC | F |
| <i>C. bretschneideri</i> | 44 | 77597  | <i>psbT-psbN</i>       | Spacer | LSC | 44 | 77597  | <i>psbT-psbN</i>       | Spacer | LSC | P |
| <i>C. bretschneideri</i> | 32 | 92533  | <i>ycf2</i>            | Exon   | IRa | 32 | 92554  | <i>ycf2</i>            | Exon   | IRa | F |
| <i>C. bretschneideri</i> | 32 | 92533  | <i>ycf2</i>            | Exon   | IRa | 32 | 154622 | <i>ycf2</i>            | Exon   | IRb | P |
| <i>C. bretschneideri</i> | 32 | 92554  | <i>ycf2</i>            | Exon   | IRa | 32 | 154643 | <i>ycf2</i>            | Exon   | IRb | P |
| <i>C. bretschneideri</i> | 34 | 94955  | <i>ycf2</i>            | Exon   | IRa | 34 | 94973  | <i>ycf2</i>            | Exon   | IRa | F |
| <i>C. bretschneideri</i> | 34 | 94955  | <i>ycf2</i>            | Exon   | IRa | 34 | 152201 | <i>ycf2</i>            | Exon   | IRb | P |
| <i>C. bretschneideri</i> | 34 | 94973  | <i>ycf2</i>            | Exon   | IRa | 34 | 152219 | <i>ycf2</i>            | Exon   | IRb | P |
| <i>C. bretschneideri</i> | 35 | 97965  | <i>trnL(CAA)-ndhB</i>  | Spacer | IRa | 35 | 97986  | <i>trnL(CAA)-ndhB</i>  | Spacer | IRa | F |
| <i>C. bretschneideri</i> | 35 | 97965  | <i>trnL(CAA)-ndhB</i>  | Spacer | IRa | 35 | 149187 | <i>ndhB-trnL(CAA)</i>  | Spacer | IRb | P |
| <i>C. bretschneideri</i> | 35 | 97986  | <i>trnL(CAA)-ndhB</i>  | Spacer | IRa | 35 | 149208 | <i>ndhB-trnL(CAA)</i>  | Spacer | IRb | P |
| <i>C. bretschneideri</i> | 31 | 99654  | <i>ndhB</i>            | Exon   | IRa | 31 | 99654  | <i>ndhB</i>            | Exon   | IRa | P |
| <i>C. bretschneideri</i> | 31 | 99654  | <i>ndhB</i>            | Exon   | IRa | 31 | 147523 | <i>ndhB</i>            | Intron | IRb | F |
| <i>C. bretschneideri</i> | 40 | 102297 | <i>rps12-trnV(GAC)</i> | Spacer | IRa | 40 | 125076 | <i>ndhA</i>            | Intron | SSC | F |
| <i>C. bretschneideri</i> | 30 | 113483 | <i>ycf1</i>            | Exon   | IRa | 30 | 113483 | <i>ycf1</i>            | Exon   | IRa | P |
| <i>C. bretschneideri</i> | 30 | 113483 | <i>ycf1</i>            | Exon   | IRa | 30 | 133695 | <i>ycf1</i>            | Exon   | IRb | F |
| <i>C. bretschneideri</i> | 31 | 116608 | <i>ndhF-rpl32</i>      | Spacer | SSC | 31 | 116658 | <i>ndhF-rpl32</i>      | Spacer | SSC | F |
| <i>C. bretschneideri</i> | 53 | 116612 | <i>ndhF-rpl32</i>      | Spacer | SSC | 53 | 116637 | <i>ndhF-rpl32</i>      | Spacer | SSC | F |
| <i>C. bretschneideri</i> | 30 | 118670 | <i>rpl32-trnL(UAG)</i> | Spacer | SSC | 30 | 118691 | <i>rpl32-trnL(UAG)</i> | Spacer | SSC | F |
| <i>C. bretschneideri</i> | 31 | 118687 | <i>rpl32-trnL(UAG)</i> | Spacer | SSC | 31 | 118711 | <i>rpl32-trnL(UAG)</i> | Spacer | SSC | F |
| <i>C. bretschneideri</i> | 40 | 125076 | <i>ndhA</i>            | Intron | SSC | 40 | 144871 | <i>trnV(GAC)-rps12</i> | Spacer | IRb | P |
| <i>C. bretschneideri</i> | 30 | 133695 | <i>ycf1</i>            | Exon   | IRb | 30 | 133695 | <i>ycf1</i>            | Exon   | IRb | P |
| <i>C. bretschneideri</i> | 31 | 147523 | <i>ndhB</i>            | Intron | IRb | 31 | 147523 | <i>ndhB</i>            | Intron | IRb | P |
| <i>C. bretschneideri</i> | 35 | 149187 | <i>ndhB-trnL(CAA)</i>  | Spacer | IRb | 35 | 149208 | <i>ndhB-trnL(CAA)</i>  | Spacer | IRb | F |
| <i>C. bretschneideri</i> | 34 | 152201 | <i>ycf2</i>            | Exon   | IRb | 34 | 152219 | <i>ycf2</i>            | Exon   | IRb | F |
| <i>C. bretschneideri</i> | 32 | 154622 | <i>ycf2</i>            | Exon   | IRb | 32 | 154643 | <i>ycf2</i>            | Exon   | IRb | F |

|                                            |    |       |                       |        |     |    |        |                        |        |     |   |
|--------------------------------------------|----|-------|-----------------------|--------|-----|----|--------|------------------------|--------|-----|---|
| <i>C. pinnatifida</i> var.<br><i>major</i> | 31 | 186   | <i>trnH(GUG)-psbA</i> | Spacer | LSC | 31 | 186    | <i>trnH(GUG)-psbA</i>  | Spacer | LSC | P |
| <i>C. pinnatifida</i> var.<br><i>major</i> | 31 | 8357  | <i>psbI-trnS(GCU)</i> | Spacer | LSC | 31 | 38084  | <i>trnS(UGA)-psbZ</i>  | Spacer | LSC | F |
| <i>C. pinnatifida</i> var.<br><i>major</i> | 30 | 8358  | <i>psbI-trnS(GCU)</i> | Spacer | LSC | 30 | 47800  | <i>trnS(GGA)-rps4</i>  | Spacer | LSC | P |
| <i>C. pinnatifida</i> var.<br><i>major</i> | 31 | 10214 | <i>trnR(UCU)-atpA</i> | Spacer | LSC | 31 | 10231  | <i>trnR(UCU)-atpA</i>  | Spacer | LSC | P |
| <i>C. pinnatifida</i> var.<br><i>major</i> | 31 | 10219 | <i>trnR(UCU)-atpA</i> | Spacer | LSC | 31 | 10219  | <i>trnR(UCU)-atpA</i>  | Spacer | LSC | P |
| <i>C. pinnatifida</i> var.<br><i>major</i> | 31 | 10569 | <i>trnR(UCU)-atpA</i> | Spacer | LSC | 31 | 10584  | <i>trnR(UCU)-atpA</i>  | Spacer | LSC | C |
| <i>C. pinnatifida</i> var.<br><i>major</i> | 33 | 13717 | <i>atpF-atpH</i>      | Spacer | LSC | 33 | 13717  | <i>atpF-atpH</i>       | Spacer | LSC | P |
| <i>C. pinnatifida</i> var.<br><i>major</i> | 31 | 15144 | <i>atpH-atpI</i>      | Spacer | LSC | 31 | 15169  | <i>atpH-atpI</i>       | Spacer | LSC | F |
| <i>C. pinnatifida</i> var.<br><i>major</i> | 32 | 32168 | <i>psbM-trnD(GUC)</i> | Spacer | LSC | 32 | 32168  | <i>psbM-trnD(GUC)</i>  | Spacer | LSC | P |
| <i>C. pinnatifida</i> var.<br><i>major</i> | 33 | 34153 | <i>trnT(GGU)-psbD</i> | Spacer | LSC | 33 | 34212  | <i>trnT(GGU)-psbD</i>  | Spacer | LSC | F |
| <i>C. pinnatifida</i> var.<br><i>major</i> | 33 | 34154 | <i>trnT(GGU)-psbD</i> | Spacer | LSC | 33 | 34154  | <i>trnT(GGU)-psbD</i>  | Spacer | LSC | R |
| <i>C. pinnatifida</i> var.<br><i>major</i> | 38 | 34173 | <i>trnT(GGU)-psbD</i> | Spacer | LSC | 38 | 34192  | <i>trnT(GGU)-psbD</i>  | Spacer | LSC | F |
| <i>C. pinnatifida</i> var.<br><i>major</i> | 39 | 46336 | <i>ycf3</i>           | Intron | LSC | 39 | 102453 | <i>rps12-trnV(GAC)</i> | Spacer | IRa | F |

|                                            |    |       |                            |        |     |    |        |                            |        |     |   |
|--------------------------------------------|----|-------|----------------------------|--------|-----|----|--------|----------------------------|--------|-----|---|
| <i>C. pinnatifida</i> var.<br><i>major</i> | 39 | 46336 | <i>ycf3</i>                | Intron | LSC | 39 | 144913 | <i>trnV(GAC)-rps12</i>     | Spacer | IRb | P |
| <i>C. pinnatifida</i> var.<br><i>major</i> | 38 | 46336 | <i>ycf3</i>                | Intron | LSC | 38 | 125093 | <i>ndhA</i>                | Intron | SSC | F |
| <i>C. pinnatifida</i> var.<br><i>major</i> | 35 | 49288 | <i>trnT(UGU)-trnL(UAA)</i> | Spacer | LSC | 35 | 49322  | <i>trnT(UGU)-trnL(UAA)</i> | Spacer | LSC | F |
| <i>C. pinnatifida</i> var.<br><i>major</i> | 30 | 54031 | <i>ndhC-trnV(UAC)</i>      | Spacer | LSC | 30 | 54057  | <i>ndhC-trnV(UAC)</i>      | Spacer | LSC | F |
| <i>C. pinnatifida</i> var.<br><i>major</i> | 63 | 55505 | <i>trnM(CAU)-atpE</i>      | Spacer | LSC | 63 | 55505  | <i>trnM(CAU)-atpE</i>      | Spacer | LSC | P |
| <i>C. pinnatifida</i> var.<br><i>major</i> | 34 | 62323 | <i>accD-psaI</i>           | Spacer | LSC | 34 | 62347  | <i>accD-psaI</i>           | Spacer | LSC | F |
| <i>C. pinnatifida</i> var.<br><i>major</i> | 47 | 66655 | <i>petA-psbJ</i>           | Spacer | LSC | 47 | 66671  | <i>petA-psbJ</i>           | Spacer | LSC | F |
| <i>C. pinnatifida</i> var.<br><i>major</i> | 31 | 66655 | <i>petA-psbJ</i>           | Spacer | LSC | 31 | 66687  | <i>petA-psbJ</i>           | Spacer | LSC | F |
| <i>C. pinnatifida</i> var.<br><i>major</i> | 31 | 67313 | <i>psbL</i>                | Exon   | LSC | 31 | 67344  | <i>psbL</i>                |        | LSC | F |
| <i>C. pinnatifida</i> var.<br><i>major</i> | 32 | 70553 | <i>psaJ-rpl33</i>          | Spacer | LSC | 32 | 70553  | <i>psaJ-rpl33</i>          | Spacer | LSC | R |
| <i>C. pinnatifida</i> var.<br><i>major</i> | 44 | 77696 | <i>psbN</i>                | Exon   | LSC | 44 | 77696  | <i>psbN</i>                | Exon   | LSC | P |
| <i>C. pinnatifida</i> var.<br><i>major</i> | 31 | 82946 | <i>rpl36</i>               | Exon   | LSC | 31 | 82946  | <i>rpl36</i>               | Exon   | LSC | R |
| <i>C. pinnatifida</i> var.<br><i>major</i> | 32 | 92687 | <i>ycf2</i>                | Exon   | IRa | 32 | 92708  | <i>ycf2</i>                | Exon   | LSC | F |

|                                            |    |        |                        |        |     |    |        |                       |        |     |   |
|--------------------------------------------|----|--------|------------------------|--------|-----|----|--------|-----------------------|--------|-----|---|
| <i>C. pinnatifida</i> var.<br><i>major</i> | 32 | 92687  | <i>ycf2</i>            | Exon   | IRa | 32 | 154665 | <i>ycf2</i>           | Exon   | IRb | P |
| <i>C. pinnatifida</i> var.<br><i>major</i> | 32 | 92708  | <i>ycf2</i>            | Exon   | IRa | 32 | 154686 | <i>ycf2</i>           | Exon   | IRb | P |
| <i>C. pinnatifida</i> var.<br><i>major</i> | 34 | 95109  | <i>ycf2</i>            | Exon   | IRa | 34 | 95127  | <i>ycf2</i>           | Exon   | IRa | F |
| <i>C. pinnatifida</i> var.<br><i>major</i> | 34 | 95109  | <i>ycf2</i>            | Exon   | IRa | 34 | 152244 | <i>ycf2</i>           | Exon   | IRb | P |
| <i>C. pinnatifida</i> var.<br><i>major</i> | 34 | 95127  | <i>ycf2</i>            | Exon   | IRa | 34 | 152262 | <i>ycf2</i>           | Exon   | IRb | P |
| <i>C. pinnatifida</i> var.<br><i>major</i> | 35 | 98119  | <i>trnL(CAA)-ndhB</i>  | Spacer | IRa | 35 | 98140  | <i>trnL(CAA)-ndhB</i> | Spacer | IRa | F |
| <i>C. pinnatifida</i> var.<br><i>major</i> | 35 | 98119  | <i>trnL(CAA)-ndhB</i>  | Spacer | IRa | 35 | 149230 | <i>ndhB-trnL(CAA)</i> | Spacer | IRb | P |
| <i>C. pinnatifida</i> var.<br><i>major</i> | 35 | 98140  | <i>trnL(CAA)-ndhB</i>  | Spacer | IRa | 35 | 149251 | <i>ndhB-trnL(CAA)</i> | Spacer | IRb | P |
| <i>C. pinnatifida</i> var.<br><i>major</i> | 31 | 99808  | <i>ndhB</i>            | Intron | IRa | 31 | 99808  | <i>ndhB</i>           | Intron | IRa | P |
| <i>C. pinnatifida</i> var.<br><i>major</i> | 31 | 99808  | <i>ndhB</i>            | Intron | IRa | 31 | 147566 | <i>ndhB</i>           | Intron | IRb | F |
| <i>C. pinnatifida</i> var.<br><i>major</i> | 40 | 102451 | <i>rps12-trnV(GAC)</i> | Spacer | IRa | 40 | 125091 | <i>ndhA</i>           | Intron | SSC | F |
| <i>C. pinnatifida</i> var.<br><i>major</i> | 33 | 111401 | <i>rrn4.5-rrn5</i>     | Spacer | IRa | 33 | 111432 | <i>rrn5</i>           | Exon   | IRa | F |
| <i>C. pinnatifida</i> var.<br><i>major</i> | 33 | 111401 | <i>rrn4.5-rrn5</i>     | Spacer | IRa | 33 | 135940 | <i>rrn5-rrn4.5</i>    | Spacer | IRb | P |

|                                            |    |        |                       |        |     |    |        |                        |        |     |   |
|--------------------------------------------|----|--------|-----------------------|--------|-----|----|--------|------------------------|--------|-----|---|
| <i>C. pinnatifida</i> var.<br><i>major</i> | 33 | 111432 | <i>rrn5</i>           | Exon   | IRa | 33 | 135971 | <i>rrn5-rrn4.5</i>     | Spacer | IRb | P |
| <i>C. pinnatifida</i> var.<br><i>major</i> | 30 | 113668 | <i>ycf1</i>           | Exon   | IRa | 30 | 113668 | <i>ycf1</i>            | Exon   | IRa | P |
| <i>C. pinnatifida</i> var.<br><i>major</i> | 30 | 113668 | <i>ycf1</i>           | Exon   | IRa | 30 | 133707 | <i>ycf1</i>            | Exon   | IRb | F |
| <i>C. pinnatifida</i> var.<br><i>major</i> | 40 | 125091 | <i>ndhA</i>           | Intron | SSC | 40 | 144914 | <i>trnV(GAC)-rps12</i> | Spacer | IRb | P |
| <i>C. pinnatifida</i> var.<br><i>major</i> | 30 | 133707 | <i>ycf1</i>           | Exon   | IRb | 30 | 133707 | <i>ycf1</i>            | Exon   | IRb | P |
| <i>C. pinnatifida</i> var.<br><i>major</i> | 33 | 135940 | <i>rrn5-rrn4.5</i>    | Spacer | IRb | 33 | 135971 | <i>rrn5-rrn4.5</i>     | Spacer | IRb | F |
| <i>C. pinnatifida</i> var.<br><i>major</i> | 31 | 147566 | <i>ndhB</i>           | Intron | IRb | 31 | 147566 | <i>ndhB</i>            | Intron | IRb | P |
| <i>C. pinnatifida</i> var.<br><i>major</i> | 35 | 149230 | <i>ndhB-trnL(CAA)</i> | Spacer | IRb | 35 | 149251 | <i>ndhB-trnL(CAA)</i>  | Spacer | IRb | F |
| <i>C. pinnatifida</i> var.<br><i>major</i> | 34 | 152244 | <i>ycf2</i>           | Exon   | IRb | 34 | 152262 | <i>ycf2</i>            | Exon   | IRb | F |
| <i>C. pinnatifida</i> var.<br><i>major</i> | 32 | 154665 | <i>ycf2</i>           | Exon   | IRb | 32 | 154686 | <i>ycf2</i>            | Exon   | IRb | F |
| <i>C. pinnatifida</i>                      | 31 | 186    | <i>trnH(GUG)-psbA</i> | Spacer | LSC | 31 | 186    | <i>trnH(GUG)-psbA</i>  | Spacer | LSC | P |
| <i>C. pinnatifida</i>                      | 31 | 8357   | <i>psbI-trnS(GCU)</i> | Spacer | LSC | 31 | 38095  | <i>trnS(UGA)</i>       | Exon   | LSC | F |
| <i>C. pinnatifida</i>                      | 30 | 8358   | <i>psbI-trnS(GCU)</i> | Spacer | LSC | 30 | 47811  | <i>trnS(GGA)-rps4</i>  | Spacer | LSC | P |
| <i>C. pinnatifida</i>                      | 31 | 10214  | <i>trnR(UCU)-atpA</i> | Spacer | LSC | 31 | 10231  | <i>trnR(UCU)-atpA</i>  | Spacer | LSC | P |
| <i>C. pinnatifida</i>                      | 31 | 10219  | <i>trnR(UCU)-atpA</i> | Spacer | LSC | 31 | 10219  | <i>trnR(UCU)-atpA</i>  | Spacer | LSC | P |
| <i>C. pinnatifida</i>                      | 31 | 10278  | <i>trnR(UCU)-atpA</i> | Spacer | LSC | 31 | 10303  | <i>trnR(UCU)-atpA</i>  | Spacer | LSC | F |

|                       |    |       |                            |        |     |    |        |                            |        |     |   |
|-----------------------|----|-------|----------------------------|--------|-----|----|--------|----------------------------|--------|-----|---|
| <i>C. pinnatifida</i> | 31 | 10578 | <i>trnR(UCU)-atpA</i>      | Spacer | LSC | 31 | 10593  | <i>trnR(UCU)-atpA</i>      | Spacer | LSC | C |
| <i>C. pinnatifida</i> | 33 | 13726 | <i>atpF-atpH</i>           | Spacer | LSC | 33 | 13726  | <i>atpF-atpH</i>           | Spacer | LSC | P |
| <i>C. pinnatifida</i> | 31 | 15155 | <i>atpH-atpI</i>           | Spacer | LSC | 31 | 15180  | <i>atpH-atpI</i>           | Spacer | LSC | F |
| <i>C. pinnatifida</i> | 32 | 32179 | <i>psbM-trnD(GUC)</i>      | Spacer | LSC | 32 | 32179  | <i>psbM-trnD(GUC)</i>      | Spacer | LSC | P |
| <i>C. pinnatifida</i> | 33 | 34164 | <i>trnT(GGU)-psbD</i>      | Spacer | LSC | 33 | 34223  | <i>trnT(GGU)-psbD</i>      | Spacer | LSC | F |
| <i>C. pinnatifida</i> | 33 | 34165 | <i>trnT(GGU)-psbD</i>      | Spacer | LSC | 33 | 34165  | <i>trnT(GGU)-psbD</i>      | Spacer | LSC | R |
| <i>C. pinnatifida</i> | 38 | 34184 | <i>trnT(GGU)-psbD</i>      | Spacer | LSC | 38 | 34203  | <i>trnT(GGU)-psbD</i>      | Spacer | LSC | F |
| <i>C. pinnatifida</i> | 39 | 46347 | <i>ycf3</i>                | Intron | LSC | 39 | 102448 | <i>rps12-trnV(GAC)</i>     | Spacer | IRa | F |
| <i>C. pinnatifida</i> | 39 | 46347 | <i>ycf3</i>                | Intron | LSC | 39 | 144933 | <i>trnV(GAC)-rps12</i>     | Spacer | IRb | P |
| <i>C. pinnatifida</i> | 38 | 46347 | <i>ycf3</i>                | Intron | LSC | 38 | 125089 | <i>ndhA</i>                | Intron | SSC | F |
| <i>C. pinnatifida</i> | 35 | 49299 | <i>trnT(UGU)-trnL(UAA)</i> | Spacer | LSC | 35 | 49333  | <i>trnT(UGU)-trnL(UAA)</i> | Spacer | LSC | F |
| <i>C. pinnatifida</i> | 30 | 54047 | <i>ndhC-trnV(UAC)</i>      | Spacer | LSC | 30 | 54073  | <i>ndhC-trnV(UAC)</i>      | Spacer | LSC | F |
| <i>C. pinnatifida</i> | 63 | 55484 | <i>trnM(CAU)-atpE</i>      | Spacer | LSC | 63 | 55484  | <i>trnM(CAU)-atpE</i>      | Spacer | LSC | P |
| <i>C. pinnatifida</i> | 34 | 62302 | <i>accD-psaI</i>           | Spacer | LSC | 34 | 62326  | <i>accD-psaI</i>           | Spacer | LSC | F |
| <i>C. pinnatifida</i> | 63 | 66634 | <i>petA-psbJ</i>           | Spacer | LSC | 63 | 66650  | <i>petA-psbJ</i>           | Spacer | LSC | F |
| <i>C. pinnatifida</i> | 47 | 66634 | <i>petA-psbJ</i>           | Spacer | LSC | 47 | 66666  | <i>petA-psbJ</i>           | Spacer | LSC | F |
| <i>C. pinnatifida</i> | 31 | 66634 | <i>petA-psbJ</i>           | Spacer | LSC | 31 | 66682  | <i>petA-psbJ</i>           | Spacer | LSC | F |
| <i>C. pinnatifida</i> | 31 | 67308 | <i>psbL</i>                | Exon   | LSC | 31 | 67339  | <i>psbL</i>                | Exon   | LSC | F |
| <i>C. pinnatifida</i> | 32 | 70548 | <i>psaJ-rpl33</i>          | Spacer | LSC | 32 | 70548  | <i>psaJ-rpl33</i>          | Spacer | LSC | R |
| <i>C. pinnatifida</i> | 44 | 77692 | <i>psbN</i>                | Exon   | LSC | 44 | 77692  | <i>psbN</i>                | Exon   | LSC | P |
| <i>C. pinnatifida</i> | 31 | 82942 | <i>rpl36</i>               | Exon   | LSC | 31 | 82942  | <i>rpl36</i>               | Exon   | LSC | R |
| <i>C. pinnatifida</i> | 32 | 92682 | <i>ycf2</i>                | Exon   | IRa | 32 | 92703  | <i>ycf2</i>                | Exon   | IRa | F |
| <i>C. pinnatifida</i> | 32 | 92682 | <i>ycf2</i>                | Exon   | IRa | 32 | 154685 | <i>ycf2</i>                | Exon   | IRb | P |
| <i>C. pinnatifida</i> | 32 | 92703 | <i>ycf2</i>                | Exon   | IRa | 32 | 154706 | <i>ycf2</i>                | Exon   | IRb | P |
| <i>C. pinnatifida</i> | 34 | 95104 | <i>ycf2</i>                | Exon   | IRa | 34 | 95122  | <i>ycf2</i>                | Exon   | IRa | F |
| <i>C. pinnatifida</i> | 34 | 95104 | <i>ycf2</i>                | Exon   | IRa | 34 | 152264 | <i>ycf2</i>                | Exon   | IRb | P |

|                        |    |        |                            |        |     |    |        |                            |        |     |   |
|------------------------|----|--------|----------------------------|--------|-----|----|--------|----------------------------|--------|-----|---|
| <i>C. pinnatifida</i>  | 34 | 95122  | <i>ycf2</i>                | Exon   | IRa | 34 | 152282 | <i>ycf2</i>                | Exon   | IRb | P |
| <i>C. pinnatifida</i>  | 35 | 98114  | <i>trnL(CAA)-ndhB</i>      | Spacer | IRa | 35 | 98135  | <i>trnL(CAA)-ndhB</i>      | Spacer | IRa | F |
| <i>C. pinnatifida</i>  | 35 | 98114  | <i>trnL(CAA)-ndhB</i>      | Spacer | IRa | 35 | 149250 | <i>ndhB-trnL(CAA)</i>      | Spacer | IRb | P |
| <i>C. pinnatifida</i>  | 35 | 98135  | <i>trnL(CAA)-ndhB</i>      | Spacer | IRa | 35 | 149271 | <i>ndhB-trnL(CAA)</i>      | Spacer | IRb | P |
| <i>C. pinnatifida</i>  | 31 | 99803  | <i>ndhB</i>                | Intron | IRa | 31 | 99803  | <i>ndhB</i>                | Intron | IRa | P |
| <i>C. pinnatifida</i>  | 40 | 102446 | <i>rps12-trnV(GAC)</i>     | Spacer | IRa | 40 | 125087 | <i>ndhA</i>                | Intron | SSC | F |
| <i>C. pinnatifida</i>  | 33 | 111396 | <i>rrn4.5-rrn5</i>         | Spacer | IRa | 33 | 111427 | <i>rrn5</i>                | Exon   | IRa | F |
| <i>C. pinnatifida</i>  | 33 | 111396 | <i>rrn4.5-rrn5</i>         | Spacer | IRa | 33 | 135960 | <i>rrn5-rrn4.5</i>         | Spacer | IRb | P |
| <i>C. pinnatifida</i>  | 33 | 111427 | <i>rrn5</i>                | Exon   | IRa | 33 | 135991 | <i>rrn5-rrn4.5</i>         | Spacer | IRb | P |
| <i>C. pinnatifida</i>  | 30 | 113663 | <i>ycf1</i>                | Exon   | IRa | 30 | 113663 | <i>ycf1</i>                | Exon   | IRa | P |
| <i>C. pinnatifida</i>  | 30 | 113663 | <i>ycf1</i>                | Exon   | IRa | 30 | 133727 | <i>ycf1</i>                | Exon   | IRb | F |
| <i>C. pinnatifida</i>  | 40 | 125087 | <i>ndhA</i>                | Intron | SSC | 40 | 144934 | <i>trnV(GAC)-rps12</i>     | Spacer | IRb | P |
| <i>C. pinnatifida</i>  | 30 | 133727 | <i>ycf1</i>                | Exon   | IRb | 30 | 133727 | <i>ycf1</i>                | Exon   | IRb | P |
| <i>C. pinnatifida</i>  | 33 | 135960 | <i>rrn5-rrn4.5</i>         | Spacer | IRb | 33 | 135991 | <i>rrn5-rrn4.5</i>         | Spacer | IRb | F |
| <i>C. pinnatifida</i>  | 35 | 149250 | <i>ndhB-trnL(CAA)</i>      | Spacer | IRb | 35 | 149271 | <i>ndhB-trnL(CAA)</i>      | Spacer | IRb | F |
| <i>C. pinnatifida</i>  | 34 | 152264 | <i>ycf2</i>                | Exon   | IRb | 34 | 152282 | <i>ycf2</i>                | Exon   | IRb | F |
| <i>C. pinnatifida</i>  | 32 | 154685 | <i>ycf2</i>                | Exon   | IRb | 32 | 154706 | <i>ycf2</i>                | Exon   | IRb | F |
| <i>C. maximowiczii</i> | 31 | 233    | <i>trnH(GUG)-psbA</i>      | Spacer | LSC | 31 | 242    | <i>trnH(GUG)-psbA</i>      | Spacer | LSC | F |
| <i>C. maximowiczii</i> | 30 | 8369   | <i>psbI-trnS(GCU)</i>      | Spacer | LSC | 30 | 47871  | <i>trnS(GGA)-rps4</i>      | Spacer | LSC | P |
| <i>C. maximowiczii</i> | 48 | 10233  | <i>trnR(UCU)-atpA</i>      | Spacer | LSC | 48 | 10233  | <i>trnR(UCU)-atpA</i>      | Spacer | LSC | P |
| <i>C. maximowiczii</i> | 35 | 10641  | <i>trnR(UCU)-atpA</i>      | Spacer | LSC | 35 | 10668  | <i>trnR(UCU)-atpA</i>      | Spacer | LSC | F |
| <i>C. maximowiczii</i> | 33 | 13751  | <i>atpF-atpH</i>           | Spacer | LSC | 33 | 13751  | <i>atpF-atpH</i>           | Spacer | LSC | P |
| <i>C. maximowiczii</i> | 33 | 30926  | <i>psbM-trnD(GUC)</i>      | Spacer | LSC | 33 | 71305  | <i>rps18</i>               | Exon   | LSC | R |
| <i>C. maximowiczii</i> | 30 | 31901  | <i>psbM-trnD(GUC)</i>      | Spacer | LSC | 30 | 31901  | <i>psbM-trnD(GUC)</i>      | Spacer | LSC | R |
| <i>C. maximowiczii</i> | 32 | 32163  | <i>psbM-trnD(GUC)</i>      | Spacer | LSC | 32 | 32163  | <i>psbM-trnD(GUC)</i>      | Spacer | LSC | P |
| <i>C. maximowiczii</i> | 30 | 33495  | <i>trnE(UUC)-trnT(GGU)</i> | Spacer | LSC | 30 | 33509  | <i>trnE(UUC)-trnT(GGU)</i> | Spacer | LSC | F |



|                        |    |       |                            |        |     |    |        |                            |        |     |   |
|------------------------|----|-------|----------------------------|--------|-----|----|--------|----------------------------|--------|-----|---|
| <i>C. maximowiczii</i> | 30 | 39039 | <i>psbZ-trnG(UCC)</i>      | Spacer | LSC | 30 | 39040  | <i>psbZ-trnG(UCC)</i>      | Spacer | LSC | F |
| <i>C. maximowiczii</i> | 39 | 46403 | <i>ycf3</i>                | Intron | LSC | 39 | 102578 | <i>rps12</i>               | Exon   | IRa | F |
| <i>C. maximowiczii</i> | 39 | 46403 | <i>ycf3</i>                | Intron | LSC | 39 | 145132 | <i>rps12</i>               | Exon   | IRb | P |
| <i>C. maximowiczii</i> | 38 | 46403 | <i>ycf3</i>                | Intron | LSC | 38 | 125332 | <i>ndhA</i>                | Intron | SSC | F |
| <i>C. maximowiczii</i> | 30 | 46415 | <i>ycf3</i>                | Intron | LSC | 30 | 102590 | <i>rps12</i>               | Exon   | IRa | F |
| <i>C. maximowiczii</i> | 30 | 46415 | <i>ycf3</i>                | Intron | LSC | 30 | 145129 | <i>rps12</i>               | Exon   | IRb | P |
| <i>C. maximowiczii</i> | 35 | 49322 | <i>trnT(UGU)-trnL(UAA)</i> | Spacer | LSC | 35 | 49356  | <i>trnT(UGU)-trnL(UAA)</i> | Spacer | LSC | F |
| <i>C. maximowiczii</i> | 30 | 49773 | <i>trnT(UGU)-trnL(UAA)</i> | Spacer | LSC | 30 | 49797  | <i>trnT(UGU)-trnL(UAA)</i> | Spacer | LSC | F |
| <i>C. maximowiczii</i> | 30 | 49874 | <i>trnT(UGU)-trnL(UAA)</i> | Spacer | LSC | 30 | 49903  | <i>trnT(UGU)-trnL(UAA)</i> | Spacer | LSC | F |
| <i>C. maximowiczii</i> | 41 | 49875 | <i>trnT(UGU)-trnL(UAA)</i> | Spacer | LSC | 41 | 49892  | <i>trnT(UGU)-trnL(UAA)</i> | Spacer | LSC | P |
| <i>C. maximowiczii</i> | 36 | 54444 | <i>trnV(UAC)</i>           | Intron | LSC | 36 | 54462  | <i>trnV(UAC)</i>           | Intron | LSC | F |
| <i>C. maximowiczii</i> | 33 | 54552 | <i>trnV(UAC)</i>           | Intron | LSC | 33 | 83118  | <i>rpl36-infA</i>          | Spacer | LSC | F |
| <i>C. maximowiczii</i> | 63 | 55733 | <i>atpE</i>                | Exon   | LSC | 63 | 55733  | <i>atpE</i>                | Exon   | LSC | P |
| <i>C. maximowiczii</i> | 38 | 70242 | <i>psaJ</i>                | Exon   | LSC | 38 | 70275  | <i>psaJ</i>                | Exon   | LSC | F |
| <i>C. maximowiczii</i> | 32 | 70656 | <i>psaJ-rpl33</i>          | Spacer | LSC | 32 | 70656  | <i>psaJ-rpl33</i>          | Spacer | LSC | R |
| <i>C. maximowiczii</i> | 44 | 77820 | <i>psbN-psbH</i>           | Spacer | LSC | 44 | 77820  | <i>psbN-psbH</i>           | Spacer | LSC | P |
| <i>C. maximowiczii</i> | 52 | 81456 | <i>rpoA</i>                | Exon   | LSC | 52 | 81507  | <i>rpoA</i>                | Exon   | LSC | F |
| <i>C. maximowiczii</i> | 32 | 83110 | <i>rpl36-infA</i>          | Spacer | LSC | 32 | 83110  | <i>rpl36-infA</i>          | Spacer | LSC | R |
| <i>C. maximowiczii</i> | 32 | 92812 | <i>ycf2</i>                | Exon   | IRa | 32 | 92833  | <i>ycf2</i>                | Exon   | IRa | F |
| <i>C. maximowiczii</i> | 32 | 92812 | <i>ycf2</i>                | Exon   | IRa | 32 | 154884 | <i>ycf2</i>                | Exon   | IRb | P |
| <i>C. maximowiczii</i> | 32 | 92833 | <i>ycf2</i>                | Exon   | IRa | 32 | 154905 | <i>ycf2</i>                | Exon   | IRb | P |
| <i>C. maximowiczii</i> | 34 | 95234 | <i>ycf2</i>                | Exon   | IRa | 34 | 95252  | <i>ycf2</i>                | Exon   | IRa | F |
| <i>C. maximowiczii</i> | 34 | 95234 | <i>ycf2</i>                | Exon   | IRa | 34 | 152463 | <i>ycf2</i>                | Exon   | IRb | P |
| <i>C. maximowiczii</i> | 34 | 95252 | <i>ycf2</i>                | Exon   | IRa | 34 | 152481 | <i>ycf2</i>                | Exon   | IRb | P |
| <i>C. maximowiczii</i> | 35 | 98244 | <i>trnL(CAA)-ndhB</i>      | Spacer | IRa | 35 | 98265  | <i>trnL(CAA)-ndhB</i>      | Spacer | IRa | F |
| <i>C. maximowiczii</i> | 35 | 98244 | <i>trnL(CAA)-ndhB</i>      | Spacer | IRa | 35 | 149449 | <i>trnL(CAA)</i>           | Exon   | IRb | P |

|                        |    |        |                       |        |     |    |        |                       |        |     |   |
|------------------------|----|--------|-----------------------|--------|-----|----|--------|-----------------------|--------|-----|---|
| <i>C. maximowiczii</i> | 35 | 98265  | <i>trnL(CAA)-ndhB</i> | Spacer | IRa | 35 | 149470 | <i>trnL(CAA)</i>      | Exon   | IRb | P |
| <i>C. maximowiczii</i> | 40 | 102576 | <i>rps12</i>          | Exon   | IRa | 40 | 125330 | <i>ndhA</i>           | Intron | SSC | F |
| <i>C. maximowiczii</i> | 33 | 111526 | <i>rrn5</i>           | Exon   | IRa | 33 | 111557 | <i>rrn5-trnR(ACG)</i> | Spacer | IRa | F |
| <i>C. maximowiczii</i> | 33 | 111526 | <i>rrn5</i>           | Exon   | IRa | 33 | 136159 | <i>rrn4.5-rrn23</i>   | Spacer | IRb | P |
| <i>C. maximowiczii</i> | 33 | 111557 | <i>rrn5-trnR(ACG)</i> | Spacer | IRa | 33 | 136190 | <i>rrn4.5-rrn23</i>   | Spacer | IRb | P |
| <i>C. maximowiczii</i> | 30 | 113793 | <i>ycf1</i>           | Exon   | IRa | 30 | 113793 | <i>ycf1</i>           | Exon   | IRa | P |
| <i>C. maximowiczii</i> | 30 | 113793 | <i>ycf1</i>           | Exon   | IRa | 30 | 133926 | <i>ycf1</i>           | Exon   | IRb | F |
| <i>C. maximowiczii</i> | 30 | 116918 | <i>ndhF-rpl32</i>     | Spacer | SSC | 30 | 116943 | <i>ndhF-rpl32</i>     | Spacer | SSC | F |
| <i>C. maximowiczii</i> | 40 | 125330 | <i>ndhA</i>           | Intron | SSC | 40 | 145133 | <i>rps12</i>          | Exon   | IRb | P |
| <i>C. maximowiczii</i> | 30 | 133926 | <i>ycf1</i>           | Exon   | IRb | 30 | 133926 | <i>ycf1</i>           | Exon   | IRb | P |
| <i>C. maximowiczii</i> | 33 | 136159 | <i>rrn4.5-rrn23</i>   | Spacer | IRb | 33 | 136190 | <i>rrn4.5-rrn23</i>   | Spacer | IRb | F |
| <i>C. maximowiczii</i> | 35 | 149449 | <i>trnL(CAA)</i>      | Exon   | IRb | 35 | 149470 | <i>trnL(CAA)</i>      | Exon   | IRb | F |
| <i>C. maximowiczii</i> | 34 | 152463 | <i>ycf2</i>           | Exon   | IRb | 34 | 152481 | <i>ycf2</i>           | Exon   | IRb | F |
| <i>C. maximowiczii</i> | 32 | 154884 | <i>ycf2</i>           | Exon   | IRb | 32 | 154905 | <i>ycf2</i>           | Exon   | IRb | F |

---

**Table S2.** The simple sequence repeats (SSRs) of four *Crataegus* species.

| Name                    | StartPos | EndPos | Location               | Partition1 | Partition2 | Repetitions | Motif | Base |
|-------------------------|----------|--------|------------------------|------------|------------|-------------|-------|------|
| <i>C. bretschnideri</i> | 16       | 25     | <i>rps19-trnH(GUG)</i> | spacer     | LSC        | 5           | AT    | 2    |
| <i>C. bretschnideri</i> | 32       | 41     | <i>rps19-trnH(GUG)</i> | spacer     | LSC        | 5           | AT    | 2    |
| <i>C. bretschnideri</i> | 230      | 244    | <i>psba</i>            | exon       | LSC        | 15          | T     | 1    |
| <i>C. bretschnideri</i> | 248      | 260    | <i>psba</i>            | exon       | LSC        | 13          | A     | 1    |
| <i>C. bretschnideri</i> | 2834     | 2844   | <i>matK</i>            | exon       | LSC        | 11          | T     | 1    |
| <i>C. bretschnideri</i> | 2989     | 2999   | <i>matK</i>            | exon       | LSC        | 11          | A     | 1    |
| <i>C. bretschnideri</i> | 4367     | 4376   | <i>trnK(UUU)-rps16</i> | spacer     | LSC        | 10          | A     | 1    |
| <i>C. bretschnideri</i> | 4860     | 4871   | <i>trnK(UUU)-rps16</i> | spacer     | LSC        | 12          | A     | 1    |
| <i>C. bretschnideri</i> | 5579     | 5588   | <i>rps16</i>           | intron     | LSC        | 10          | C     | 1    |
| <i>C. bretschnideri</i> | 5735     | 5746   | <i>rps16</i>           | intron     | LSC        | 12          | C     | 1    |
| <i>C. bretschnideri</i> | 5748     | 5757   | <i>rps16</i>           | intron     | LSC        | 10          | A     | 1    |
| <i>C. bretschnideri</i> | 6634     | 6645   | <i>rps16-trnQ(UUG)</i> | spacer     | LSC        | 12          | T     | 1    |
| <i>C. bretschnideri</i> | 7084     | 7095   | <i>rps16-trnQ(UUG)</i> | spacer     | LSC        | 4           | TAA   | 3    |
| <i>C. bretschnideri</i> | 7095     | 7109   | <i>rps16-trnQ(UUG)</i> | spacer     | LSC        | 13          | A     | 1    |
| <i>C. bretschnideri</i> | 7987     | 7999   | <i>psbk-psbI</i>       | spacer     | LSC        | 13          | A     | 1    |
| <i>C. bretschnideri</i> | 9428     | 9438   | <i>trnG(GCC)</i>       | intron     | LSC        | 11          | T     | 1    |
| <i>C. bretschnideri</i> | 9792     | 9801   | <i>trnG(GCC)</i>       | intron     | LSC        | 10          | T     | 1    |
| <i>C. bretschnideri</i> | 13496    | 13509  | <i>atpF</i>            | intron     | LSC        | 14          | T     | 1    |
| <i>C. bretschnideri</i> | 14472    | 14482  | <i>atpH-atpI</i>       | spacer     | LSC        | 10          | A     | 1    |
| <i>C. bretschnideri</i> | 15012    | 15023  | <i>atpH-atpI</i>       | spacer     | LSC        | 12          | C     | 1    |
| <i>C. bretschnideri</i> | 15227    | 15236  | <i>atpH-atpI</i>       | spacer     | LSC        | 10          | A     | 1    |
| <i>C. bretschnideri</i> | 15505    | 15523  | <i>atpH-atpI</i>       | spacer     | LSC        | 19          | T     | 1    |
| <i>C. bretschnideri</i> | 17354    | 17363  | <i>rps2-rpoC2</i>      | spacer     | LSC        | 10          | T     | 1    |
| <i>C. bretschnideri</i> | 17367    | 17376  | <i>rps2-rpoC2</i>      | spacer     | LSC        | 10          | A     | 1    |

|                          |       |       |                            |        |     |    |       |   |
|--------------------------|-------|-------|----------------------------|--------|-----|----|-------|---|
| <i>C. bretschneideri</i> | 19605 | 19615 | <i>rpoC2</i>               | exon   | LSC | 11 | T     | 1 |
| <i>C. bretschneideri</i> | 20986 | 20995 | <i>rpoC2</i>               | exon   | LSC | 5  | TA    | 2 |
| <i>C. bretschneideri</i> | 24060 | 24069 | <i>rpoC1</i>               | intron | LSC | 10 | T     | 1 |
| <i>C. bretschneideri</i> | 27308 | 27317 | <i>rpoB</i>                | exon   | LSC | 10 | T     | 1 |
| <i>C. bretschneideri</i> | 27953 | 27962 | <i>rpoB</i>                | exon   | LSC | 10 | T     | 1 |
| <i>C. bretschneideri</i> | 28269 | 28283 | <i>rpoB-trnC(GCA)</i>      | spacer | LSC | 3  | TCCAA | 5 |
| <i>C. bretschneideri</i> | 28389 | 28399 | <i>rpoB-trnC(GCA)</i>      | spacer | LSC | 11 | A     | 1 |
| <i>C. bretschneideri</i> | 31204 | 31217 | <i>petN-psbM</i>           | spacer | LSC | 7  | TA    | 2 |
| <i>C. bretschneideri</i> | 31836 | 31847 | <i>psbM-trnD(GUC)</i>      | spacer | LSC | 3  | TTTA  | 4 |
| <i>C. bretschneideri</i> | 32113 | 32124 | <i>psbM-trnD(GUC)</i>      | spacer | LSC | 12 | T     | 1 |
| <i>C. bretschneideri</i> | 32193 |       | <i>psbM-trnD(GUC)</i>      | spacer | LSC | 13 | A     | 1 |
| <i>C. bretschneideri</i> | 33119 | 33132 | <i>trnD(GUC)-trnY(GUA)</i> | spacer | LSC | 14 | T     | 1 |
| <i>C. bretschneideri</i> | 38634 | 38643 | <i>trnS(UGA)-psbZ</i>      | spacer | LSC | 5  | TA    | 2 |
| <i>C. bretschneideri</i> | 38685 | 38699 | <i>trnS(UGA)-psbZ</i>      | spacer | LSC | 15 | A     | 1 |
| <i>C. bretschneideri</i> | 38731 | 38741 | <i>trnS(UGA)-psbZ</i>      | spacer | LSC | 11 | T     | 1 |
| <i>C. bretschneideri</i> | 39305 | 39316 | <i>psbZ-trnG(UCC)</i>      | spacer | LSC | 4  | ATA   | 3 |
| <i>C. bretschneideri</i> | 45338 | 45350 | <i>psaA-ycf3</i>           | spacer | LSC | 13 | A     | 1 |
| <i>C. bretschneideri</i> | 45862 | 45872 | <i>ycf3</i>                | intron | LSC | 11 | T     | 1 |
| <i>C. bretschneideri</i> | 47693 | 47709 | <i>ycf3-trnS(GGA)</i>      | spacer | LSC | 17 | A     | 1 |
| <i>C. bretschneideri</i> | 50020 | 50029 | <i>trnT(UGU)-trnL(UAA)</i> | spacer | LSC | 5  | AT    | 2 |
| <i>C. bretschneideri</i> | 50587 | 50600 | <i>trnT(UGU)-trnL(UAA)</i> | spacer | LSC | 14 | A     | 1 |
| <i>C. bretschneideri</i> | 52591 | 52601 | <i>trnF(GAA)-ndhJ</i>      | spacer | LSC | 11 | T     | 1 |
| <i>C. bretschneideri</i> | 52634 | 52646 | <i>trnF(GAA)-ndhJ</i>      | spacer | LSC | 13 | A     | 1 |
| <i>C. bretschneideri</i> | 54057 | 54072 | <i>ndhK-ndhC</i>           | spacer | LSC | 16 | T     | 1 |
| <i>C. bretschneideri</i> | 54925 | 54934 | <i>ndhC-trnV(UAC)</i>      | spacer | LSC | 5  | TA    | 2 |
| <i>C. bretschneideri</i> | 55063 | 55072 | <i>ndhC-trnV(UAC)</i>      | spacer | LSC | 5  | TA    | 2 |

|                          |        |        |                            |        |     |    |      |   |
|--------------------------|--------|--------|----------------------------|--------|-----|----|------|---|
| <i>C. bretschneideri</i> | 55074  | 55085  | <i>ndhC-trnV(UAC)</i>      | spacer | LSC | 6  | AT   | 2 |
| <i>C. bretschneideri</i> | 58129  | 58138  | <i>atpB</i>                | exon   | LSC | 10 | T    | 1 |
| <i>C. bretschneideri</i> | 60838  | 60850  | <i>rbcL-accD</i>           | spacer | LSC | 13 | T    | 1 |
| <i>C. bretschneideri</i> | 62960  | 62973  | <i>accD-psaI</i>           | spacer | LSC | 7  | TA   | 2 |
| <i>C. bretschneideri</i> | 63188  | 63197  | <i>accD-psaI</i>           | spacer | LSC | 5  | TA   | 2 |
| <i>C. bretschneideri</i> | 63477  | 63490  | <i>psaI-ycf4</i>           | spacer | LSC | 7  | TA   | 2 |
| <i>C. bretschneideri</i> | 65032  | 65041  | <i>cemA</i>                | exon   | LSC | 5  | TC   | 2 |
| <i>C. bretschneideri</i> | 67296  | 67305  | <i>petA-psbJ</i>           | spacer | LSC | 5  | TA   | 2 |
| <i>C. bretschneideri</i> | 67751  | 67760  | <i>petA-psbJ</i>           | spacer | LSC | 10 | A    | 1 |
| <i>C. bretschneideri</i> | 69131  | 69144  | <i>psbE-petL</i>           | spacer | LSC | 14 | T    | 1 |
| <i>C. bretschneideri</i> | 69460  | 69469  | <i>psbE-petL</i>           | spacer | LSC | 10 | A    | 1 |
| <i>C. bretschneideri</i> | 70559  | 70568  | <i>trnW(CCA)-trnP(UGG)</i> | spacer | LSC | 5  | AT   | 2 |
| <i>C. bretschneideri</i> | 71446  | 71459  | <i>psaJ-rpl33</i>          | spacer | LSC | 14 | A    | 1 |
| <i>C. bretschneideri</i> | 72078  | 72087  | <i>rpl33-rps18</i>         | spacer | LSC | 5  | AT   | 2 |
| <i>C. bretschneideri</i> | 74794  | 74805  | <i>clpP</i>                | intron | LSC | 12 | T    | 1 |
| <i>C. bretschneideri</i> | 75476  | 75487  | <i>clpP</i>                | intron | LSC | 12 | A    | 1 |
| <i>C. bretschneideri</i> | 75522  | 75539  | <i>clpP</i>                | intron | LSC | 18 | T    | 1 |
| <i>C. bretschneideri</i> | 76482  | 76491  | <i>clpP-psbB</i>           | spacer | LSC | 5  | AT   | 2 |
| <i>C. bretschneideri</i> | 83901  | 83914  | <i>rps11-rpl36</i>         | spacer | LSC | 14 | T    | 1 |
| <i>C. bretschneideri</i> | 83917  | 83928  | <i>rps11-rpl36</i>         | spacer | LSC | 3  | TTAT | 4 |
| <i>C. bretschneideri</i> | 85544  | 85557  | <i>rpl14-rpl16</i>         | spacer | LSC | 14 | T    | 1 |
| <i>C. bretschneideri</i> | 86903  | 86920  | <i>rpl16</i>               | intron | LSC | 18 | T    | 1 |
| <i>C. bretschneideri</i> | 87164  | 87174  | <i>rpl16-rps3</i>          | spacer | LSC | 11 | T    | 1 |
| <i>C. bretschneideri</i> | 87970  | 87979  | <i>rps3-rpl22</i>          | spacer | LSC | 10 | T    | 1 |
| <i>C. bretschneideri</i> | 104735 | 104744 | <i>rps12-trnV(GAC)</i>     | spacer | Ira | 10 | T    | 1 |
| <i>C. bretschneideri</i> | 112719 | 112728 | <i>rrn5-trnR(ACG)</i>      | spacer | Ira | 10 | A    | 1 |

|                          |        |        |                            |        |     |    |      |   |
|--------------------------|--------|--------|----------------------------|--------|-----|----|------|---|
| <i>C. bretschneideri</i> | 113128 | 113139 | <i>trnR(ACG)-trnN(GUU)</i> | spacer | Ira | 3  | TTTA | 4 |
| <i>C. bretschneideri</i> | 113930 | 113939 | <i>trnN(GUU)-ycfI</i>      | spacer | Ira | 5  | TA   | 2 |
| <i>C. bretschneideri</i> | 117336 | 117357 | <i>ndhF-rpl32</i>          | spacer | SSC | 22 | A    | 1 |
| <i>C. bretschneideri</i> | 117563 | 117574 | <i>ndhF-rpl32</i>          | spacer | SSC | 12 | A    | 1 |
| <i>C. bretschneideri</i> | 118241 | 118250 | <i>ndhF-rpl32</i>          | spacer | SSC | 10 | T    | 1 |
| <i>C. bretschneideri</i> | 118336 | 118345 | <i>ndhF-rpl32</i>          | spacer | SSC | 10 | C    | 1 |
| <i>C. bretschneideri</i> | 118828 | 118837 | <i>rpl32-trnL(UAG)</i>     | spacer | SSC | 10 | A    | 1 |
| <i>C. bretschneideri</i> | 119391 | 119400 | <i>rpl32-trnL(UAG)</i>     | spacer | SSC | 5  | TA   | 2 |
| <i>C. bretschneideri</i> | 121382 | 121393 | <i>ccsA-ndhD</i>           | spacer | SSC | 3  | ATTT | 4 |
| <i>C. bretschneideri</i> | 124098 | 124109 | <i>ndhE-ndhG</i>           | spacer | SSC | 3  | TTAA | 4 |
| <i>C. bretschneideri</i> | 125631 | 125640 | <i>ndhI-ndhA</i>           | spacer | SSC | 5  | AT   | 2 |
| <i>C. bretschneideri</i> | 126739 | 126753 | <i>ndhA</i>                | intron | SSC | 15 | T    | 1 |
| <i>C. bretschneideri</i> | 132681 | 132690 | <i>ycfI</i>                | exon   | SSC | 10 | T    | 1 |
| <i>C. bretschneideri</i> | 133318 | 133327 | <i>ycfI</i>                | exon   | SSC | 10 | A    | 1 |
| <i>C. bretschneideri</i> | 135660 | 135669 | <i>ycfI-trnN(GUU)</i>      | spacer | Irb | 5  | AT   | 2 |
| <i>C. bretschneideri</i> | 136459 | 136470 | <i>trnN(GUU)-trnR(ACG)</i> | spacer | Irb | 3  | AATA | 4 |
| <i>C. bretschneideri</i> | 136872 | 136881 | <i>trnR(ACG)-rrn5</i>      | spacer | Irb | 10 | T    | 1 |
| <i>C. bretschneideri</i> | 144856 | 144865 | <i>trnV(GAC)-rps12</i>     | spacer | Irb | 10 | A    | 1 |
| <i>C. maximowiczii</i>   | 16     | 25     | <i>rps19-trnH(GUG)</i>     | spacer | LSC | 5  | AT   | 2 |
| <i>C. maximowiczii</i>   | 230    | 245    | <i>psba</i>                | exon   | LSC | 16 | T    | 1 |
| <i>C. maximowiczii</i>   | 249    | 260    | <i>psba</i>                | exon   | LSC | 12 | A    | 1 |
| <i>C. maximowiczii</i>   | 2834   | 2844   | <i>matK</i>                | exon   | LSC | 11 | T    | 1 |
| <i>C. maximowiczii</i>   | 2989   | 2999   | <i>matK</i>                | exon   | LSC | 11 | A    | 1 |
| <i>C. maximowiczii</i>   | 4366   | 4376   | <i>trnK(UUU)-rps16</i>     | spacer | LSC | 11 | A    | 1 |
| <i>C. maximowiczii</i>   | 4862   | 4871   | <i>trnK(UUU)-rps16</i>     | spacer | LSC | 10 | A    | 1 |
| <i>C. maximowiczii</i>   | 5578   | 5588   | <i>rps16</i>               | intron | LSC | 11 | C    | 1 |

|                        |       |       |                        |        |     |    |       |   |
|------------------------|-------|-------|------------------------|--------|-----|----|-------|---|
| <i>C. maximowiczii</i> | 5735  | 5744  | <i>rps16</i>           | intron | LSC | 10 | C     | 1 |
| <i>C. maximowiczii</i> | 5748  |       | <i>rps16</i>           | intron | LSC | 12 | A     | 1 |
| <i>C. maximowiczii</i> | 6636  | 6645  | <i>rps16-trnQ(UUG)</i> | spacer | LSC | 10 | T     | 1 |
| <i>C. maximowiczii</i> | 7084  | 7095  | <i>rps16-trnQ(UUG)</i> | spacer | LSC | 4  | TAA   | 3 |
| <i>C. maximowiczii</i> | 7094  | 7109  | <i>rps16-trnQ(UUG)</i> | spacer | LSC | 14 | A     | 1 |
| <i>C. maximowiczii</i> | 7987  | 7999  | <i>psbk-psbI</i>       | spacer | LSC | 13 | A     | 1 |
| <i>C. maximowiczii</i> | 9428  | 9438  | <i>trnG(GCC)</i>       | intron | LSC | 11 | T     | 1 |
| <i>C. maximowiczii</i> | 9792  | 9801  | <i>trnG(GCC)</i>       | intron | LSC | 10 | T     | 1 |
| <i>C. maximowiczii</i> | 12420 | 12429 | <i>atpA-atpF</i>       | spacer | LSC | 10 | T     | 1 |
| <i>C. maximowiczii</i> | 13494 | 13509 | <i>atpF</i>            | intron | LSC | 16 | T     | 1 |
| <i>C. maximowiczii</i> | 14472 | 14482 | <i>atpH-atpI</i>       | spacer | LSC | 10 | A     | 1 |
| <i>C. maximowiczii</i> | 15013 | 15023 | <i>atpH-atpI</i>       | spacer | LSC | 11 | C     | 1 |
| <i>C. maximowiczii</i> | 15227 | 15236 | <i>atpH-atpI</i>       | spacer | LSC | 10 | A     | 1 |
| <i>C. maximowiczii</i> | 15510 | 15523 | <i>atpH-atpI</i>       | spacer | LSC | 14 | T     | 1 |
| <i>C. maximowiczii</i> | 17354 | 17363 | <i>rps2-rpoC2</i>      | spacer | LSC | 10 | T     | 1 |
| <i>C. maximowiczii</i> | 17367 | 17376 | <i>rps2-rpoC2</i>      | spacer | LSC | 10 | A     | 1 |
| <i>C. maximowiczii</i> | 19605 | 19615 | <i>rpoC2</i>           | exon   | LSC | 11 | T     | 1 |
| <i>C. maximowiczii</i> | 20986 | 20995 | <i>rpoC2</i>           | exon   | LSC | 5  | TA    | 2 |
| <i>C. maximowiczii</i> | 24060 | 24069 | <i>rpoC1</i>           | intron | LSC | 10 | T     | 1 |
| <i>C. maximowiczii</i> | 27308 | 27317 | <i>rpoB</i>            | exon   | LSC | 10 | T     | 1 |
| <i>C. maximowiczii</i> | 27953 | 27962 | <i>rpoB</i>            | exon   | LSC | 10 | T     | 1 |
| <i>C. maximowiczii</i> | 28269 | 28283 | <i>rpoB-trnC(GCA)</i>  | spacer | LSC | 3  | TCCAA | 5 |
| <i>C. maximowiczii</i> | 28388 | 28399 | <i>rpoB-trnC(GCA)</i>  | spacer | LSC | 12 | A     | 1 |
| <i>C. maximowiczii</i> | 31204 | 31213 | <i>petN-psbM</i>       | spacer | LSC | 5  | TA    | 2 |
| <i>C. maximowiczii</i> | 31836 | 31847 | <i>psbM-trnD(GUC)</i>  | spacer | LSC | 3  | TTTA  | 4 |
| <i>C. maximowiczii</i> | 32193 |       | <i>psbM-trnD(GUC)</i>  | spacer | LSC | 10 | A     | 1 |

|                        |       |       |                            |        |     |    |      |   |
|------------------------|-------|-------|----------------------------|--------|-----|----|------|---|
| <i>C. maximowiczii</i> | 38634 | 38643 | <i>trnS(UGA)-psbZ</i>      | spacer | LSC | 5  | TA   | 2 |
| <i>C. maximowiczii</i> | 38685 | 38699 | <i>trnS(UGA)-psbZ</i>      | spacer | LSC | 15 | A    | 1 |
| <i>C. maximowiczii</i> | 38731 | 38741 | <i>trnS(UGA)-psbZ</i>      | spacer | LSC | 11 | T    | 1 |
| <i>C. maximowiczii</i> | 39305 | 39316 | <i>psbZ-trnG(UCC)</i>      | spacer | LSC | 4  | ATA  | 3 |
| <i>C. maximowiczii</i> | 39357 | 39369 | <i>psbZ-trnG(UCC)</i>      | spacer | LSC | 13 | A    | 1 |
| <i>C. maximowiczii</i> | 39372 | 39387 | <i>psbZ-trnG(UCC)</i>      | spacer | LSC | 16 | A    | 1 |
| <i>C. maximowiczii</i> | 39394 | 39405 | <i>psbZ-trnG(UCC)</i>      | spacer | LSC | 3  | TTTA | 4 |
| <i>C. maximowiczii</i> | 45339 | 45350 | <i>psaA-ycf3</i>           | spacer | LSC | 12 | A    | 1 |
| <i>C. maximowiczii</i> | 47693 | 47709 | <i>ycf3-trnS(GGA)</i>      | spacer | LSC | 17 | A    | 1 |
| <i>C. maximowiczii</i> | 50020 | 50029 | <i>trnT(UGU)-trnL(UAA)</i> | spacer | LSC | 5  | AT   | 2 |
| <i>C. maximowiczii</i> | 50585 | 50600 | <i>trnT(UGU)-trnL(UAA)</i> | spacer | LSC | 16 | A    | 1 |
| <i>C. maximowiczii</i> | 52157 | 52166 | <i>trnF(GAA)-ndhJ</i>      | spacer | LSC | 5  | TA   | 2 |
| <i>C. maximowiczii</i> | 52590 | 52601 | <i>trnF(GAA)-ndhJ</i>      | spacer | LSC | 12 | T    | 1 |
| <i>C. maximowiczii</i> | 52634 | 52643 | <i>trnF(GAA)-ndhJ</i>      | spacer | LSC | 10 | A    | 1 |
| <i>C. maximowiczii</i> | 54060 | 54072 | <i>ndhK-ndhC</i>           | spacer | LSC | 13 | T    | 1 |
| <i>C. maximowiczii</i> | 55025 | 55034 | <i>ndhC-trnV(UAC)</i>      | spacer | LSC | 10 | T    | 1 |
| <i>C. maximowiczii</i> | 55063 | 55072 | <i>ndhC-trnV(UAC)</i>      | spacer | LSC | 5  | TA   | 2 |
| <i>C. maximowiczii</i> | 55074 | 55085 | <i>ndhC-trnV(UAC)</i>      | spacer | LSC | 6  | AT   | 2 |
| <i>C. maximowiczii</i> | 58129 | 58138 | <i>atpB</i>                | exon   | LSC | 10 | T    | 1 |
| <i>C. maximowiczii</i> | 60836 | 60850 | <i>rbcL-accD</i>           | spacer | LSC | 15 | T    | 1 |
| <i>C. maximowiczii</i> | 62964 | 62973 | <i>accD-psaI</i>           | spacer | LSC | 5  | TA   | 2 |
| <i>C. maximowiczii</i> | 63188 | 63197 | <i>accD-psaI</i>           | spacer | LSC | 5  | TA   | 2 |
| <i>C. maximowiczii</i> | 63477 | 63490 | <i>psaI-ycf4</i>           | spacer | LSC | 7  | TA   | 2 |
| <i>C. maximowiczii</i> | 64706 | 64715 | <i>ycf4-cemA</i>           | spacer | LSC | 10 | T    | 1 |
| <i>C. maximowiczii</i> | 65032 | 65041 | <i>cemA</i>                | exon   | LSC | 5  | TC   | 2 |
| <i>C. maximowiczii</i> | 67277 | 67286 | <i>petA-psbJ</i>           | spacer | LSC | 10 | T    | 1 |



|                        |        |        |                            |        |     |    |      |   |
|------------------------|--------|--------|----------------------------|--------|-----|----|------|---|
| <i>C. maximowiczii</i> | 67292  | 67305  | <i>petA-psbJ</i>           | spacer | LSC | 7  | TA   | 2 |
| <i>C. maximowiczii</i> | 67751  | 67760  | <i>petA-psbJ</i>           | spacer | LSC | 10 | A    | 1 |
| <i>C. maximowiczii</i> | 68705  | 68714  | <i>psbE-petL</i>           | spacer | LSC | 10 | G    | 1 |
| <i>C. maximowiczii</i> | 69131  | 69144  | <i>psbE-petL</i>           | spacer | LSC | 14 | T    | 1 |
| <i>C. maximowiczii</i> | 69427  | 69437  | <i>psbE-petL</i>           | spacer | LSC | 11 | A    | 1 |
| <i>C. maximowiczii</i> | 69459  | 69469  | <i>psbE-petL</i>           | spacer | LSC | 11 | A    | 1 |
| <i>C. maximowiczii</i> | 70559  | 70568  | <i>trnW(CCA)-trnP(UGG)</i> | spacer | LSC | 5  | AT   | 2 |
| <i>C. maximowiczii</i> | 71442  | 71459  | <i>psaJ-rpl33</i>          | spacer | LSC | 18 | A    | 1 |
| <i>C. maximowiczii</i> | 72078  | 72087  | <i>rpl33-rps18</i>         | spacer | LSC | 5  | AT   | 2 |
| <i>C. maximowiczii</i> | 74791  | 74805  | <i>clpP</i>                | intron | LSC | 15 | T    | 1 |
| <i>C. maximowiczii</i> | 75477  | 75487  | <i>clpP</i>                | intron | LSC | 11 | A    | 1 |
| <i>C. maximowiczii</i> | 75523  | 75539  | <i>clpP</i>                | intron | LSC | 17 | T    | 1 |
| <i>C. maximowiczii</i> | 76482  | 76491  | <i>clpP-psbB</i>           | spacer | LSC | 5  | AT   | 2 |
| <i>C. maximowiczii</i> | 83896  | 83914  | <i>rps11-rpl36</i>         | spacer | LSC | 19 | T    | 1 |
| <i>C. maximowiczii</i> | 83917  | 83928  | <i>rps11-rpl36</i>         | spacer | LSC | 3  | TTAT | 4 |
| <i>C. maximowiczii</i> | 85547  | 85557  | <i>rpl14-rpl16</i>         | spacer | LSC | 11 | T    | 1 |
| <i>C. maximowiczii</i> | 86904  | 86916  | <i>rpl16</i>               | intron | LSC | 13 | T    | 1 |
| <i>C. maximowiczii</i> | 87163  | 87177  | <i>rpl16-rps3</i>          | spacer | LSC | 15 | T    | 1 |
| <i>C. maximowiczii</i> | 87970  | 87979  | <i>rps3-rpl22</i>          | spacer | LSC | 10 | T    | 1 |
| <i>C. maximowiczii</i> | 104735 | 104744 | <i>rps12-trnV(GAC)</i>     | spacer | Ira | 10 | T    | 1 |
| <i>C. maximowiczii</i> | 112719 | 112728 | <i>rrn5-trnR(ACG)</i>      | spacer | Ira | 10 | A    | 1 |
| <i>C. maximowiczii</i> | 113128 | 113139 | <i>trnR(ACG)-trnN(GUU)</i> | spacer | Ira | 3  | TTTA | 4 |
| <i>C. maximowiczii</i> | 113930 | 113939 | <i>trnN(GUU)-yefI</i>      | spacer | Ira | 5  | TA   | 2 |
| <i>C. maximowiczii</i> | 117338 | 117357 | <i>ndhF-rpl32</i>          | spacer | SSC | 20 | A    | 1 |
| <i>C. maximowiczii</i> | 117563 | 117574 | <i>ndhF-rpl32</i>          | spacer | SSC | 12 | A    | 1 |
| <i>C. maximowiczii</i> | 118827 | 118841 | <i>rpl32-trnL(UAG)</i>     | spacer | SSC | 15 | A    | 1 |

|                        |        |        |                            |        |     |    |      |   |
|------------------------|--------|--------|----------------------------|--------|-----|----|------|---|
| <i>C. maximowiczii</i> | 121382 | 121393 | <i>ccsA-ndhD</i>           | spacer | SSC | 3  | ATTT | 4 |
| <i>C. maximowiczii</i> | 124098 | 124109 | <i>ndhE-ndhG</i>           | spacer | SSC | 3  | TTAA | 4 |
| <i>C. maximowiczii</i> | 125631 | 125640 | <i>ndhI-ndhA</i>           | spacer | SSC | 5  | AT   | 2 |
| <i>C. maximowiczii</i> | 126741 | 126753 | <i>ndhA</i>                | intron | SSC | 13 | T    | 1 |
| <i>C. maximowiczii</i> | 132681 | 132690 | <i>ycfI</i>                | exon   | SSC | 10 | T    | 1 |
| <i>C. maximowiczii</i> | 133318 | 133327 | <i>ycfI</i>                | exon   | SSC | 10 | A    | 1 |
| <i>C. maximowiczii</i> | 135660 | 135669 | <i>ycfI-trnN(GUU)</i>      | spacer | Irb | 5  | AT   | 2 |
| <i>C. maximowiczii</i> | 136459 | 136470 | <i>trnN(GUU)-trnR(ACG)</i> | spacer | Irb | 3  | AATA | 4 |
| <i>C. maximowiczii</i> | 136872 | 136881 | <i>trnR(ACG)-rrn5</i>      | spacer | Irb | 10 | T    | 1 |
| <i>C. maximowiczii</i> | 144856 | 144865 | <i>trnV(GAC)-rps12</i>     | spacer | Irb | 10 | A    | 1 |
| <i>C. pinnatifida</i>  | 230    | 243    | <i>psba</i>                | exon   | LSC | 14 | T    | 1 |
| <i>C. pinnatifida</i>  | 249    | 260    | <i>psba</i>                | exon   | LSC | 12 | A    | 1 |
| <i>C. pinnatifida</i>  | 2834   | 2844   | <i>matK</i>                | exon   | LSC | 11 | T    | 1 |
| <i>C. pinnatifida</i>  | 4367   | 4376   | <i>trnK(UUU)-rps16</i>     | spacer | LSC | 10 | A    | 1 |
| <i>C. pinnatifida</i>  | 4854   | 4871   | <i>trnK(UUU)-rps16</i>     | spacer | LSC | 18 | A    | 1 |
| <i>C. pinnatifida</i>  | 5579   | 5588   | <i>rps16</i>               | intron | LSC | 10 | C    | 1 |
| <i>C. pinnatifida</i>  | 5735   | 5747   | <i>rps16</i>               | intron | LSC | 13 | C    | 1 |
| <i>C. pinnatifida</i>  | 6634   | 6644   | <i>rps16-trnQ(UUG)</i>     | spacer | LSC | 11 | T    | 1 |
| <i>C. pinnatifida</i>  | 6932   | 6941   | <i>rps16-trnQ(UUG)</i>     | spacer | LSC | 10 | A    | 1 |
| <i>C. pinnatifida</i>  | 7084   | 7095   | <i>rps16-trnQ(UUG)</i>     | spacer | LSC | 4  | TAA  | 3 |
| <i>C. pinnatifida</i>  | 7988   | 7999   | <i>psbk-psbI</i>           | spacer | LSC | 12 | A    | 1 |
| <i>C. pinnatifida</i>  | 9427   | 9438   | <i>trnG(GCC)</i>           | intron | LSC | 12 | T    | 1 |
| <i>C. pinnatifida</i>  | 9792   | 9801   | <i>trnG(GCC)</i>           | intron | LSC | 10 | T    | 1 |
| <i>C. pinnatifida</i>  | 13140  | 13152  | <i>atpF</i>                | intron | LSC | 13 | T    | 1 |
| <i>C. pinnatifida</i>  | 13497  | 13509  | <i>atpF</i>                | intron | LSC | 13 | T    | 1 |
| <i>C. pinnatifida</i>  | 13888  | 13897  | <i>atpF-atpH</i>           | spacer | LSC | 10 | T    | 1 |

|                       |       |       |                            |        |     |    |       |   |
|-----------------------|-------|-------|----------------------------|--------|-----|----|-------|---|
| <i>C. pinnatifida</i> | 14472 | 14482 | <i>atpH-atpI</i>           | spacer | LSC | 11 | A     | 1 |
| <i>C. pinnatifida</i> | 15007 | 15020 | <i>atpH-atpI</i>           | spacer | LSC | 14 | C     | 1 |
| <i>C. pinnatifida</i> | 15021 | 15031 | <i>atpH-atpI</i>           | spacer | LSC | 11 | T     | 1 |
| <i>C. pinnatifida</i> | 15227 | 15236 | <i>atpH-atpI</i>           | spacer | LSC | 10 | A     | 1 |
| <i>C. pinnatifida</i> | 15512 | 15523 | <i>atpH-atpI</i>           | spacer | LSC | 12 | T     | 1 |
| <i>C. pinnatifida</i> | 17354 | 17363 | <i>rps2-rpoC2</i>          | spacer | LSC | 10 | T     | 1 |
| <i>C. pinnatifida</i> | 17367 | 17376 | <i>rps2-rpoC2</i>          | spacer | LSC | 10 | A     | 1 |
| <i>C. pinnatifida</i> | 19605 | 19615 | <i>rpoC2</i>               | exon   | LSC | 11 | T     | 1 |
| <i>C. pinnatifida</i> | 20986 | 20995 | <i>rpoC2</i>               | exon   | LSC | 5  | TA    | 2 |
| <i>C. pinnatifida</i> | 27308 | 27317 | <i>rpoB</i>                | exon   | LSC | 10 | T     | 1 |
| <i>C. pinnatifida</i> | 28269 | 28283 | <i>rpoB-trnC(GCA)</i>      | spacer | LSC | 3  | TCCAA | 5 |
| <i>C. pinnatifida</i> | 28384 | 28399 | <i>rpoB-trnC(GCA)</i>      | spacer | LSC | 16 | A     | 1 |
| <i>C. pinnatifida</i> | 31204 | 31213 | <i>petN-psbM</i>           | spacer | LSC | 5  | TA    | 2 |
| <i>C. pinnatifida</i> | 31836 | 31847 | <i>psbM-trnD(GUC)</i>      | spacer | LSC | 3  | TTTA  | 4 |
| <i>C. pinnatifida</i> | 32193 | 32206 | <i>psbM-trnD(GUC)</i>      | spacer | LSC | 14 | A     | 1 |
| <i>C. pinnatifida</i> | 38634 | 38643 | <i>trnS(UGA)-psbZ</i>      | spacer | LSC | 5  | TA    | 2 |
| <i>C. pinnatifida</i> | 38687 | 38699 | <i>trnS(UGA)-psbZ</i>      | spacer | LSC | 13 | A     | 1 |
| <i>C. pinnatifida</i> | 38732 | 38741 | <i>trnS(UGA)-psbZ</i>      | spacer | LSC | 10 | T     | 1 |
| <i>C. pinnatifida</i> | 39377 | 39387 | <i>psbZ-trnG(UCC)</i>      | spacer | LSC | 11 | A     | 1 |
| <i>C. pinnatifida</i> | 45341 | 45350 | <i>psaA-yef3</i>           | spacer | LSC | 10 | A     | 1 |
| <i>C. pinnatifida</i> | 45863 | 45872 | <i>yef3</i>                | intron | LSC | 10 | T     | 1 |
| <i>C. pinnatifida</i> | 47697 | 47709 | <i>yef3-trnS(GGA)</i>      | spacer | LSC | 13 | A     | 1 |
| <i>C. pinnatifida</i> | 50020 | 50029 | <i>trnT(UGU)-trnL(UAA)</i> | spacer | LSC | 5  | AT    | 2 |
| <i>C. pinnatifida</i> | 50591 | 50600 | <i>trnT(UGU)-trnL(UAA)</i> | spacer | LSC | 10 | A     | 1 |
| <i>C. pinnatifida</i> | 52591 | 52601 | <i>trnF(GAA)-ndhJ</i>      | spacer | LSC | 11 | T     | 1 |
| <i>C. pinnatifida</i> | 54062 | 54072 | <i>ndhK-ndhC</i>           | spacer | LSC | 11 | T     | 1 |

|                       |       |       |                            |        |     |    |    |   |
|-----------------------|-------|-------|----------------------------|--------|-----|----|----|---|
| <i>C. pinnatifida</i> | 54898 | 54907 | <i>ndhC-trnV(UAC)</i>      | spacer | LSC | 5  | TA | 2 |
| <i>C. pinnatifida</i> | 54925 | 54934 | <i>ndhC-trnV(UAC)</i>      | spacer | LSC | 5  | TA | 2 |
| <i>C. pinnatifida</i> | 55063 | 55072 | <i>ndhC-trnV(UAC)</i>      | spacer | LSC | 5  | TA | 2 |
| <i>C. pinnatifida</i> | 55076 | 55085 | <i>ndhC-trnV(UAC)</i>      | spacer | LSC | 5  | AT | 2 |
| <i>C. pinnatifida</i> | 58129 | 58138 | <i>atpB</i>                | exon   | LSC | 10 | T  | 1 |
| <i>C. pinnatifida</i> | 60839 | 60850 | <i>rbcL-accD</i>           | spacer | LSC | 12 | T  | 1 |
| <i>C. pinnatifida</i> | 62964 | 62973 | <i>accD-psaI</i>           | spacer | LSC | 5  | TA | 2 |
| <i>C. pinnatifida</i> | 63188 | 63197 | <i>accD-psaI</i>           | spacer | LSC | 5  | TA | 2 |
| <i>C. pinnatifida</i> | 63477 | 63486 | <i>psaI-ycf4</i>           | spacer | LSC | 5  | TA | 2 |
| <i>C. pinnatifida</i> | 63816 | 63827 | <i>psaI-ycf4</i>           | spacer | LSC | 12 | A  | 1 |
| <i>C. pinnatifida</i> | 64706 | 64715 | <i>ycf4-cemA</i>           | spacer | LSC | 10 | T  | 1 |
| <i>C. pinnatifida</i> | 65032 | 65041 | <i>cemA</i>                | exon   | LSC | 5  | TC | 2 |
| <i>C. pinnatifida</i> | 67277 | 67296 | <i>petA-psbJ</i>           | spacer | LSC | 20 | T  | 1 |
| <i>C. pinnatifida</i> | 67751 | 67760 | <i>petA-psbJ</i>           | spacer | LSC | 10 | A  | 1 |
| <i>C. pinnatifida</i> | 68703 | 68714 | <i>psbE-petL</i>           | spacer | LSC | 12 | G  | 1 |
| <i>C. pinnatifida</i> | 69135 | 69144 | <i>psbE-petL</i>           | spacer | LSC | 10 | T  | 1 |
| <i>C. pinnatifida</i> | 69428 | 69437 | <i>psbE-petL</i>           | spacer | LSC | 10 | A  | 1 |
| <i>C. pinnatifida</i> | 69459 | 69469 | <i>psbE-petL</i>           | spacer | LSC | 11 | A  | 1 |
| <i>C. pinnatifida</i> | 70537 | 70546 | <i>trnW(CCA)-trnP(UGG)</i> | spacer | LSC | 5  | AT | 2 |
| <i>C. pinnatifida</i> | 70559 | 70568 | <i>trnW(CCA)-trnP(UGG)</i> | spacer | LSC | 5  | AT | 2 |
| <i>C. pinnatifida</i> | 71444 | 71459 | <i>psaJ-rpl33</i>          | spacer | LSC | 16 | A  | 1 |
| <i>C. pinnatifida</i> | 72078 | 72087 | <i>rpl33-rps18</i>         | spacer | LSC | 5  | AT | 2 |
| <i>C. pinnatifida</i> | 72599 | 72610 | <i>rps18-rpl20</i>         | spacer | LSC | 12 | T  | 1 |
| <i>C. pinnatifida</i> | 73344 | 73357 | <i>rpl20-rps12</i>         | spacer | LSC | 14 | T  | 1 |
| <i>C. pinnatifida</i> | 74546 | 74555 | <i>clpP</i>                | intron | LSC | 5  | AT | 2 |
| <i>C. pinnatifida</i> | 74716 | 74726 | <i>clpP</i>                | intron | LSC | 11 | A  | 1 |

|                       |        |        |                            |        |     |    |      |   |
|-----------------------|--------|--------|----------------------------|--------|-----|----|------|---|
| <i>C. pinnatifida</i> | 74793  | 74805  | <i>clpP</i>                | intron | LSC | 13 | T    | 1 |
| <i>C. pinnatifida</i> | 75475  | 75487  | <i>clpP</i>                | intron | LSC | 13 | A    | 1 |
| <i>C. pinnatifida</i> | 75524  | 75539  | <i>clpP</i>                | intron | LSC | 16 | T    | 1 |
| <i>C. pinnatifida</i> | 76482  | 76491  | <i>clpP-psbB</i>           | spacer | LSC | 5  | AT   | 2 |
| <i>C. pinnatifida</i> | 80767  | 80778  | <i>petB-petD</i>           | spacer | LSC | 12 | A    | 1 |
| <i>C. pinnatifida</i> | 83897  | 83914  | <i>rps11-rpl36</i>         | spacer | LSC | 18 | T    | 1 |
| <i>C. pinnatifida</i> | 83917  | 83928  | <i>rps11-rpl36</i>         | spacer | LSC | 3  | TTAT | 4 |
| <i>C. pinnatifida</i> | 85054  | 85066  | <i>infA-rps8</i>           | spacer | LSC | 13 | T    | 1 |
| <i>C. pinnatifida</i> | 85547  | 85557  | <i>rpl14-rpl16</i>         | spacer | LSC | 11 | T    | 1 |
| <i>C. pinnatifida</i> | 86906  | 86920  | <i>rpl16</i>               | intron | LSC | 15 | T    | 1 |
| <i>C. pinnatifida</i> | 87161  | 87174  | <i>rpl16-rps3</i>          | spacer | LSC | 14 | T    | 1 |
| <i>C. pinnatifida</i> | 87970  | 87979  | <i>rps3-rpl22</i>          | spacer | LSC | 10 | T    | 1 |
| <i>C. pinnatifida</i> | 104735 | 104744 | <i>rps12-trnV(GAC)</i>     | spacer | Ira | 10 | T    | 1 |
| <i>C. pinnatifida</i> | 112719 | 112728 | <i>rrn5-trnR(ACG)</i>      | spacer | Ira | 10 | A    | 1 |
| <i>C. pinnatifida</i> | 113128 | 113139 | <i>trnR(ACG)-trnN(GUU)</i> | spacer | Ira | 3  | TTTA | 4 |
| <i>C. pinnatifida</i> | 113930 | 113939 | <i>trnN(GUU)-ycfI</i>      | spacer | Ira | 5  | TA   | 2 |
| <i>C. pinnatifida</i> | 117337 | 117356 | <i>ndhF-rpl32</i>          | spacer | SSC | 20 | A    | 1 |
| <i>C. pinnatifida</i> | 117562 | 117574 | <i>ndhF-rpl32</i>          | spacer | SSC | 13 | A    | 1 |
| <i>C. pinnatifida</i> | 118335 | 118345 | <i>ndhF-rpl32</i>          | spacer | SSC | 11 | C    | 1 |
| <i>C. pinnatifida</i> | 119120 | 119130 | <i>rpl32-trnL(UAG)</i>     | spacer | SSC | 11 | T    | 1 |
| <i>C. pinnatifida</i> | 119390 | 119401 | <i>rpl32-trnL(UAG)</i>     | spacer | SSC | 6  | AT   | 2 |
| <i>C. pinnatifida</i> | 124775 | 124784 | <i>ndhG-ndhI</i>           | spacer | SSC | 10 | T    | 1 |
| <i>C. pinnatifida</i> | 125631 | 125640 | <i>ndhI-ndhA</i>           | spacer | SSC | 5  | AT   | 2 |
| <i>C. pinnatifida</i> | 126742 | 126753 | <i>ndhA</i>                | intron | SSC | 12 | T    | 1 |
| <i>C. pinnatifida</i> | 132681 | 132690 | <i>ycfI</i>                | exon   | SSC | 10 | T    | 1 |
| <i>C. pinnatifida</i> | 133312 | 133327 | <i>ycfI</i>                | exon   | SSC | 16 | A    | 1 |

|                                         |        |        |                            |        |     |    |      |   |
|-----------------------------------------|--------|--------|----------------------------|--------|-----|----|------|---|
| <i>C. pinnatifida</i>                   | 135660 | 135669 | <i>ycf1-trnN(GUU)</i>      | spacer | Irb | 5  | AT   | 2 |
| <i>C. pinnatifida</i>                   | 136459 | 136470 | <i>trnN(GUU)-trnR(ACG)</i> | spacer | Irb | 3  | AATA | 4 |
| <i>C. pinnatifida</i>                   | 136872 | 136881 | <i>trnR(ACG)-rrn5</i>      | spacer | Irb | 10 | T    | 1 |
| <i>C. pinnatifida</i>                   | 144856 | 144865 | <i>trnV(GAC)-rps12</i>     | spacer | Irb | 10 | A    | 1 |
| <i>C. pinnatifida</i> var. <i>major</i> | 230    | 243    | <i>psba</i>                | exon   | LSC | 14 | T    | 1 |
| <i>C. pinnatifida</i> var. <i>major</i> | 249    | 260    | <i>psba</i>                | exon   | LSC | 12 | A    | 1 |
| <i>C. pinnatifida</i> var. <i>major</i> | 2834   | 2844   | <i>matK</i>                | exon   | LSC | 11 | T    | 1 |
| <i>C. pinnatifida</i> var. <i>major</i> | 4367   | 4376   | <i>trnK(UUU)-rps16</i>     | spacer | LSC | 10 | A    | 1 |
| <i>C. pinnatifida</i> var. <i>major</i> | 4855   | 4871   | <i>trnK(UUU)-rps16</i>     | spacer | LSC | 17 | A    | 1 |
| <i>C. pinnatifida</i> var. <i>major</i> | 5579   | 5588   | <i>rps16</i>               | intron | LSC | 10 | C    | 1 |
| <i>C. pinnatifida</i> var. <i>major</i> | 5735   | 5747   | <i>rps16</i>               | intron | LSC | 13 | C    | 1 |
| <i>C. pinnatifida</i> var. <i>major</i> | 5748   | 5757   | <i>rps16</i>               | intron | LSC | 10 | A    | 1 |
| <i>C. pinnatifida</i> var. <i>major</i> | 6634   | 6644   | <i>rps16-trnQ(UUG)</i>     | spacer | LSC | 11 | T    | 1 |
| <i>C. pinnatifida</i> var. <i>major</i> | 6932   | 6941   | <i>rps16-trnQ(UUG)</i>     | spacer | LSC | 10 | A    | 1 |
| <i>C. pinnatifida</i> var. <i>major</i> | 7084   | 7095   | <i>rps16-trnQ(UUG)</i>     | spacer | LSC | 4  | TAA  | 3 |
| <i>C. pinnatifida</i> var. <i>major</i> | 7988   | 7999   | <i>psbk-psbI</i>           | spacer | LSC | 12 | A    | 1 |
| <i>C. pinnatifida</i> var. <i>major</i> | 9427   | 9438   | <i>trnG(GCC)</i>           | intron | LSC | 12 | T    | 1 |
| <i>C. pinnatifida</i> var. <i>major</i> | 9792   | 9801   | <i>trnG(GCC)</i>           | intron | LSC | 10 | T    | 1 |
| <i>C. pinnatifida</i> var. <i>major</i> | 13140  | 13152  | <i>atpF</i>                | intron | LSC | 13 | T    | 1 |
| <i>C. pinnatifida</i> var. <i>major</i> | 13497  | 13509  | <i>atpF</i>                | intron | LSC | 13 | T    | 1 |
| <i>C. pinnatifida</i> var. <i>major</i> | 13888  | 13897  | <i>atpF-atpH</i>           | spacer | LSC | 10 | T    | 1 |
| <i>C. pinnatifida</i> var. <i>major</i> | 14472  | 14482  | <i>atpH-atpI</i>           | spacer | LSC | 11 | A    | 1 |
| <i>C. pinnatifida</i> var. <i>major</i> | 15009  | 15020  | <i>atpH-atpI</i>           | spacer | LSC | 12 | C    | 1 |
| <i>C. pinnatifida</i> var. <i>major</i> | 15021  | 15031  | <i>atpH-atpI</i>           | spacer | LSC | 11 | T    | 1 |
| <i>C. pinnatifida</i> var. <i>major</i> | 15227  | 15236  | <i>atpH-atpI</i>           | spacer | LSC | 10 | A    | 1 |
| <i>C. pinnatifida</i> var. <i>major</i> | 15512  | 15523  | <i>atpH-atpI</i>           | spacer | LSC | 12 | T    | 1 |

|                                         |       |       |                            |        |     |    |       |   |
|-----------------------------------------|-------|-------|----------------------------|--------|-----|----|-------|---|
| <i>C. pinnatifida</i> var. <i>major</i> | 17354 | 17363 | <i>rps2-rpoC2</i>          | spacer | LSC | 10 | T     | 1 |
| <i>C. pinnatifida</i> var. <i>major</i> | 17367 | 17376 | <i>rps2-rpoC2</i>          | spacer | LSC | 10 | A     | 1 |
| <i>C. pinnatifida</i> var. <i>major</i> | 19605 | 19615 | <i>rpoC2</i>               | exon   | LSC | 11 | T     | 1 |
| <i>C. pinnatifida</i> var. <i>major</i> | 20986 | 20995 | <i>rpoC2</i>               | exon   | LSC | 5  | TA    | 2 |
| <i>C. pinnatifida</i> var. <i>major</i> | 27308 | 27317 | <i>rpoB</i>                | exon   | LSC | 10 | T     | 1 |
| <i>C. pinnatifida</i> var. <i>major</i> | 28269 | 28283 | <i>rpoB-trnC(GCA)</i>      | spacer | LSC | 3  | TCCAA | 5 |
| <i>C. pinnatifida</i> var. <i>major</i> | 28384 | 28399 | <i>rpoB-trnC(GCA)</i>      | spacer | LSC | 16 | A     | 1 |
| <i>C. pinnatifida</i> var. <i>major</i> | 31204 | 31213 | <i>petN-psbM</i>           | spacer | LSC | 5  | TA    | 2 |
| <i>C. pinnatifida</i> var. <i>major</i> | 31836 | 31847 | <i>psbM-trnD(GUC)</i>      | spacer | LSC | 3  | TTTA  | 4 |
| <i>C. pinnatifida</i> var. <i>major</i> | 32193 | 32206 | <i>psbM-trnD(GUC)</i>      | spacer | LSC | 14 | A     | 1 |
| <i>C. pinnatifida</i> var. <i>major</i> | 38634 | 38643 | <i>trnS(UGA)-psbZ</i>      | spacer | LSC | 5  | TA    | 2 |
| <i>C. pinnatifida</i> var. <i>major</i> | 38687 | 38699 | <i>trnS(UGA)-psbZ</i>      | spacer | LSC | 13 | A     | 1 |
| <i>C. pinnatifida</i> var. <i>major</i> | 38732 | 38741 | <i>trnS(UGA)-psbZ</i>      | spacer | LSC | 10 | T     | 1 |
| <i>C. pinnatifida</i> var. <i>major</i> | 39377 | 39387 | <i>psbZ-trnG(UCC)</i>      | spacer | LSC | 11 | A     | 1 |
| <i>C. pinnatifida</i> var. <i>major</i> | 45341 | 45350 | <i>psaA-ycf3</i>           | spacer | LSC | 10 | A     | 1 |
| <i>C. pinnatifida</i> var. <i>major</i> | 45863 | 45872 | <i>ycf3</i>                | intron | LSC | 10 | T     | 1 |
| <i>C. pinnatifida</i> var. <i>major</i> | 47697 | 47709 | <i>ycf3-trnS(GGA)</i>      | spacer | LSC | 13 | A     | 1 |
| <i>C. pinnatifida</i> var. <i>major</i> | 50020 | 50029 | <i>trnT(UGU)-trnL(UAA)</i> | spacer | LSC | 5  | AT    | 2 |
| <i>C. pinnatifida</i> var. <i>major</i> | 50591 | 50600 | <i>trnT(UGU)-trnL(UAA)</i> | spacer | LSC | 10 | A     | 1 |
| <i>C. pinnatifida</i> var. <i>major</i> | 52591 | 52601 | <i>trnF(GAA)-ndhJ</i>      | spacer | LSC | 11 | T     | 1 |
| <i>C. pinnatifida</i> var. <i>major</i> | 54062 | 54072 | <i>ndhK-ndhC</i>           | spacer | LSC | 11 | T     | 1 |
| <i>C. pinnatifida</i> var. <i>major</i> | 54925 | 54934 | <i>ndhC-trnV(UAC)</i>      | spacer | LSC | 5  | TA    | 2 |
| <i>C. pinnatifida</i> var. <i>major</i> | 55063 | 55072 | <i>ndhC-trnV(UAC)</i>      | spacer | LSC | 5  | TA    | 2 |
| <i>C. pinnatifida</i> var. <i>major</i> | 55076 | 55085 | <i>ndhC-trnV(UAC)</i>      | spacer | LSC | 5  | AT    | 2 |
| <i>C. pinnatifida</i> var. <i>major</i> | 58129 | 58138 | <i>atpB</i>                | exon   | LSC | 10 | T     | 1 |
| <i>C. pinnatifida</i> var. <i>major</i> | 60839 | 60850 | <i>rbcL-accD</i>           | spacer | LSC | 12 | T     | 1 |

|                                         |       |       |                            |        |     |    |    |   |
|-----------------------------------------|-------|-------|----------------------------|--------|-----|----|----|---|
| <i>C. pinnatifida</i> var. <i>major</i> | 62964 | 62973 | <i>accD-psaI</i>           | spacer | LSC | 5  | TA | 2 |
| <i>C. pinnatifida</i> var. <i>major</i> | 63188 | 63197 | <i>accD-psaI</i>           | spacer | LSC | 5  | TA | 2 |
| <i>C. pinnatifida</i> var. <i>major</i> | 63477 | 63486 | <i>psaI-ycf4</i>           | spacer | LSC | 5  | TA | 2 |
| <i>C. pinnatifida</i> var. <i>major</i> | 63816 | 63827 | <i>psaI-ycf4</i>           | spacer | LSC | 12 | A  | 1 |
| <i>C. pinnatifida</i> var. <i>major</i> | 64706 | 64715 | <i>ycf4-cemA</i>           | spacer | LSC | 10 | T  | 1 |
| <i>C. pinnatifida</i> var. <i>major</i> | 65032 | 65041 | <i>cemA</i>                | exon   | LSC | 5  | TC | 2 |
| <i>C. pinnatifida</i> var. <i>major</i> | 67277 | 67296 | <i>petA-psbJ</i>           | spacer | LSC | 20 | T  | 1 |
| <i>C. pinnatifida</i> var. <i>major</i> | 67751 | 67760 | <i>petA-psbJ</i>           | spacer | LSC | 10 | A  | 1 |
| <i>C. pinnatifida</i> var. <i>major</i> | 68703 | 68714 | <i>psbE-petL</i>           | spacer | LSC | 12 | G  | 1 |
| <i>C. pinnatifida</i> var. <i>major</i> | 69135 | 69144 | <i>psbE-petL</i>           | spacer | LSC | 10 | T  | 1 |
| <i>C. pinnatifida</i> var. <i>major</i> | 69428 | 69437 | <i>psbE-petL</i>           | spacer | LSC | 10 | A  | 1 |
| <i>C. pinnatifida</i> var. <i>major</i> | 69459 | 69469 | <i>psbE-petL</i>           | spacer | LSC | 11 | A  | 1 |
| <i>C. pinnatifida</i> var. <i>major</i> | 70537 | 70546 | <i>trnW(CCA)-trnP(UGG)</i> | spacer | LSC | 5  | AT | 2 |
| <i>C. pinnatifida</i> var. <i>major</i> | 70559 | 70568 | <i>trnW(CCA)-trnP(UGG)</i> | spacer | LSC | 5  | AT | 2 |
| <i>C. pinnatifida</i> var. <i>major</i> | 71444 | 71459 | <i>psaJ-rpl33</i>          | spacer | LSC | 16 | A  | 1 |
| <i>C. pinnatifida</i> var. <i>major</i> | 72078 | 72087 | <i>rpl33-rps18</i>         | spacer | LSC | 5  | AT | 2 |
| <i>C. pinnatifida</i> var. <i>major</i> | 72599 | 72610 | <i>rps18-rpl20</i>         | spacer | LSC | 12 | T  | 1 |
| <i>C. pinnatifida</i> var. <i>major</i> | 73344 | 73357 | <i>rpl20-rps12</i>         | spacer | LSC | 14 | T  | 1 |
| <i>C. pinnatifida</i> var. <i>major</i> | 74546 | 74555 | <i>clpP</i>                | intron | LSC | 5  | AT | 2 |
| <i>C. pinnatifida</i> var. <i>major</i> | 74716 | 74726 | <i>clpP</i>                | intron | LSC | 11 | A  | 1 |
| <i>C. pinnatifida</i> var. <i>major</i> | 74793 | 74805 | <i>clpP</i>                | intron | LSC | 13 | T  | 1 |
| <i>C. pinnatifida</i> var. <i>major</i> | 75476 | 75487 | <i>clpP</i>                | intron | LSC | 12 | A  | 1 |
| <i>C. pinnatifida</i> var. <i>major</i> | 75524 | 75539 | <i>clpP</i>                | intron | LSC | 16 | T  | 1 |
| <i>C. pinnatifida</i> var. <i>major</i> | 76482 | 76491 | <i>clpP-psbB</i>           | spacer | LSC | 5  | AT | 2 |
| <i>C. pinnatifida</i> var. <i>major</i> | 80767 | 80778 | <i>petB-petD</i>           | spacer | LSC | 12 | A  | 1 |
| <i>C. pinnatifida</i> var. <i>major</i> | 83897 | 83914 | <i>rps11-rpl36</i>         | spacer | LSC | 18 | T  | 1 |



|                                         |        |        |                            |        |     |    |      |   |
|-----------------------------------------|--------|--------|----------------------------|--------|-----|----|------|---|
| <i>C. pinnatifida</i> var. <i>major</i> | 83917  | 83928  | <i>rps11-rpl36</i>         | spacer | LSC | 3  | TTAT | 4 |
| <i>C. pinnatifida</i> var. <i>major</i> | 85054  | 85066  | <i>infA-rps8</i>           | spacer | LSC | 13 | T    | 1 |
| <i>C. pinnatifida</i> var. <i>major</i> | 85547  | 85557  | <i>rpl14-rpl16</i>         | spacer | LSC | 11 | T    | 1 |
| <i>C. pinnatifida</i> var. <i>major</i> | 86906  | 86920  | <i>rpl16</i>               | intron | LSC | 15 | T    | 1 |
| <i>C. pinnatifida</i> var. <i>major</i> | 87161  | 87174  | <i>rpl16-rps3</i>          | spacer | LSC | 14 | T    | 1 |
| <i>C. pinnatifida</i> var. <i>major</i> | 87970  | 87979  | <i>rps3-rpl22</i>          | spacer | LSC | 10 | T    | 1 |
| <i>C. pinnatifida</i> var. <i>major</i> | 104735 | 104744 | <i>rps12-trnV(GAC)</i>     | spacer | Ira | 10 | T    | 1 |
| <i>C. pinnatifida</i> var. <i>major</i> | 112719 | 112728 | <i>rrn5-trnR(ACG)</i>      | spacer | Ira | 10 | A    | 1 |
| <i>C. pinnatifida</i> var. <i>major</i> | 113128 | 113139 | <i>trnR(ACG)-trnN(GUU)</i> | spacer | Ira | 3  | TTTA | 4 |
| <i>C. pinnatifida</i> var. <i>major</i> | 113930 | 113939 | <i>trnN(GUU)-ycfI</i>      | spacer | Ira | 5  | TA   | 2 |
| <i>C. pinnatifida</i> var. <i>major</i> | 117337 | 117356 | <i>ndhF-rpl32</i>          | spacer | SSC | 20 | A    | 1 |
| <i>C. pinnatifida</i> var. <i>major</i> | 117562 | 117574 | <i>ndhF-rpl32</i>          | spacer | SSC | 13 | A    | 1 |
| <i>C. pinnatifida</i> var. <i>major</i> | 118336 | 118345 | <i>ndhF-rpl32</i>          | spacer | SSC | 10 | C    | 1 |
| <i>C. pinnatifida</i> var. <i>major</i> | 119120 | 119130 | <i>rpl32-trnL(UAG)</i>     | spacer | SSC | 11 | T    | 1 |
| <i>C. pinnatifida</i> var. <i>major</i> | 119390 | 119401 | <i>rpl32-trnL(UAG)</i>     | spacer | SSC | 6  | AT   | 2 |
| <i>C. pinnatifida</i> var. <i>major</i> | 124775 | 124784 | <i>ndhG-ndhI</i>           | spacer | SSC | 10 | T    | 1 |
| <i>C. pinnatifida</i> var. <i>major</i> | 125631 | 125640 | <i>ndhI-ndhA</i>           | spacer | SSC | 5  | AT   | 2 |
| <i>C. pinnatifida</i> var. <i>major</i> | 126742 | 126753 | <i>ndhA</i>                | intron | SSC | 12 | T    | 1 |
| <i>C. pinnatifida</i> var. <i>major</i> | 132681 | 132690 | <i>ycfI</i>                | exon   | SSC | 10 | T    | 1 |
| <i>C. pinnatifida</i> var. <i>major</i> | 133312 | 133327 | <i>ycfI</i>                | exon   | SSC | 16 | A    | 1 |
| <i>C. pinnatifida</i> var. <i>major</i> | 135660 | 135669 | <i>ycfI-trnN(GUU)</i>      | spacer | Irb | 5  | AT   | 2 |
| <i>C. pinnatifida</i> var. <i>major</i> | 136459 | 136470 | <i>trnN(GUU)-trnR(ACG)</i> | spacer | Irb | 3  | AATA | 4 |
| <i>C. pinnatifida</i> var. <i>major</i> | 136872 | 136881 | <i>trnR(ACG)-rrn5</i>      | spacer | Irb | 10 | T    | 1 |
| <i>C. pinnatifida</i> var. <i>major</i> | 144856 | 144865 | <i>trnV(GAC)-rps12</i>     | spacer | Irb | 10 | A    | 1 |
